# Supplementary material
Source: ML conference proceedings conference paper supplement (https://proceedings.neurips.cc/paper_files/paper/2021/hash/310614fca8fb8e5491295336298c340f-Abstract.html)

## Appendix

### A Proofs

We first introduce some handy concepts and results to make the proof succinct, meanwhile providing more information for understanding our model and theory. We begin with some extended discussions on CSG.

**Definition 8.** A homeomorphism  $\Phi$  on  $\mathcal{S} \times \mathcal{V}$  is called a *reparameterization* from CSG  $p$  to CSG  $p'$ , if  $\Phi_{\#}[p_{s,v}] = p'_{s,v}$ , and  $p(x|s, v) = p'(x|\Phi(s, v))$  and  $p(y|s) = p'(y|\Phi^{\mathcal{S}}(s, v))$  for any  $(s, v) \in \mathcal{S} \times \mathcal{V}$ . A reparameterization  $\Phi$  is called to be *semantic-preserving*, if its output dimensions in  $\mathcal{S}$  is constant of  $v$ :  $\Phi^{\mathcal{S}}(s, v) = \Phi^{\mathcal{S}}(s, v')$  for any  $v, v' \in \mathcal{V}$  (hence denote  $\Phi^{\mathcal{S}}(s, v)$  as  $\Phi^{\mathcal{S}}(s)$  in this case).

Note that a reparameterization unnecessarily has its output dimensions in  $\mathcal{S}$ , *i.e.*  $\Phi^{\mathcal{S}}(s, v)$ , constant of  $v$ . The condition that  $p(y|s) = p'(y|\Phi^{\mathcal{S}}(s, v))$  for any  $v \in \mathcal{V}$  does not indicate that  $\Phi^{\mathcal{S}}(s, v)$  is constant of  $v$ , since  $p'(y|s')$  may ignore the change of  $s' = \Phi^{\mathcal{S}}(s, v)$  from the change of  $v$ . The following lemma shows the meaning of a reparameterization: it allows a CSG to vary while inducing the same distribution on the observed data variables  $(x, y)$  (*i.e.*, holding the same effect on describing data).

**Lemma 9.** *If there exists a reparameterization  $\Phi$  from CSG  $p$  to CSG  $p'$ , then  $p(x, y) = p'(x, y)$ .*

**Proof.** By the definition of a reparameterization, we have:

$$\begin{aligned} p(x, y) &= \int p(s, v)p(x|s, v)p(y|s) \, dsdv = \int \Phi_{\#}^{-1}[p'_{s,v}](s, v)p'(x|\Phi(s, v))p'(y|\Phi^{\mathcal{S}}(s, v)) \, dsdv \\ &= \int p'_{s,v}(s', v')p'(x|s', v')p'(y|s') \, ds'dv' = p'(x, y), \end{aligned}$$

where we used variable substitution  $(s', v') := \Phi(s, v)$  in the second-last equality. Note that by the definition of pushed-forward distribution and the bijectivity of  $\Phi$ ,  $\Phi_{\#}[p_{s,v}] = p'_{s,v}$  implies  $p_{s,v} = \Phi_{\#}^{-1}[p'_{s,v}]$ , and  $\int f(s', v')p'_{s,v}(s', v') \, ds'dv' = \int f(\Phi(s, v))\Phi_{\#}^{-1}[p'_{s,v}](s, v) \, dsdv$  (can also be verified deductively using the rule of change of variables, *i.e.* Lemma 12 in the following).  $\square$

We can now define and verify an equivalent relation on CSGs so that the resulting equivalent class contains CSGs that induce the same  $(x, y)$  data distribution and hold the same semantic information in their  $s$  variables.

**Definition 10** (semantic-equivalence). We say two CSGs  $p$  and  $p'$  are *semantic-equivalent*, if there exists a homeomorphism<sup>11</sup>  $\Phi$  on  $\mathcal{S} \times \mathcal{V}$ , such that **(i)** is *semantic-preserving*: its output dimensions in  $\mathcal{S}$  is constant of  $v$ ,  $\Phi^{\mathcal{S}}(s, v) = \Phi^{\mathcal{S}}(s)$  for any  $v \in \mathcal{V}$ , and **(ii)** it acts as a *reparameterization* from  $p$  to  $p'$ :  $\Phi_{\#}[p_{s,v}] = p'_{s,v}$ ,  $p(x|s, v) = p'(x|\Phi(s, v))$  and  $p(y|s) = p'(y|\Phi^{\mathcal{S}}(s))$ .

Proposition 14 in Appx. A.1 below shows that the defined binary relation is indeed an equivalence relation in common cases. As a reparameterization,  $\Phi$  allows the two models to have different latent-variable parameterizations while inducing the same distribution on the observed data variables  $(x, y)$  (Lemma 9). The definition of semantic-identification (Def. 4) is then the semantic-equivalence of the ground-truth CSG  $p^*$  to the learned CSG  $p$ , which is also the semantic-equivalence of the learned CSG  $p$  to the ground-truth CSG  $p^*$  in common cases where it is an equivalence relation (Prop. 14).

This definition of semantic-equivalence can be rephrased as the *existence* of a semantic-preserving reparameterization. With proper model assumptions, we can show that *any* reparameterization between two CSGs is semantic-preserving, so that semantic-preserving CSGs cannot be converted to each other by a reparameterization that mixes  $s$  with  $v$ .

**Lemma 11.** *For two CSGs  $p$  and  $p'$ , if  $p'(y|s)$  has a statistics  $M'(s)$  that is an injective function of  $s$ , then any reparameterization  $\Phi$  from  $p$  to  $p'$ , if exists, has its  $\Phi^{\mathcal{S}}$  constant of  $v$ .*

**Proof.** Let  $\Phi = (\Phi^{\mathcal{S}}, \Phi^{\mathcal{V}})$  be any reparameterization from  $p$  to  $p'$ . Then the condition that  $p(y|s) = p'(y|\Phi^{\mathcal{S}}(s, v))$  for any  $v \in \mathcal{V}$  indicates that  $M(s) = M'(\Phi^{\mathcal{S}}(s, v))$ . If there exist  $s \in \mathcal{S}$  and  $v^{(1)} \neq v^{(2)} \in \mathcal{V}$  such that  $\Phi^{\mathcal{S}}(s, v^{(1)}) \neq \Phi^{\mathcal{S}}(s, v^{(2)})$ , then  $M'(\Phi^{\mathcal{S}}(s, v^{(1)})) \neq M'(\Phi^{\mathcal{S}}(s, v^{(2)}))$

<sup>11</sup>A transformation is a homeomorphism if it is a continuous bijection with continuous inverse.

since  $M'$  is injective. This violates  $M(s) = M'(\Phi^{\mathcal{S}}(s, v))$  which requires both  $M'(\Phi^{\mathcal{S}}(s, v^{(1)}))$  and  $M'(\Phi^{\mathcal{S}}(s, v^{(2)}))$  to be equal to  $M(s)$ . So  $\Phi^{\mathcal{S}}(s, v)$  must be constant of  $v$ .  $\square$

We then introduce two mathematical facts.

**Lemma 12** (rule of change of variables). *Let  $z$  be a random variable on a Euclidean space  $\mathbb{R}^{dz}$  with density function  $p_z(z)$ , and let  $\Phi$  be a homeomorphism on  $\mathbb{R}^{dz}$  whose inverse  $\Phi^{-1}$  is differentiable. Then the distribution of the transformed random variable  $z' = \Phi(z)$  has a density function  $\Phi_{\#}[p_z](z') = p_z(\Phi^{-1}(z'))|J_{\Phi^{-1}}(z')|$ , where  $|J_{\Phi^{-1}}(z')|$  denotes the absolute value of the determinant of the Jacobian matrix  $(J_{\Phi^{-1}}(z'))_{ia} := \frac{\partial}{\partial z'_i}(\Phi^{-1})_a(z')$  of  $\Phi^{-1}$  at  $z'$ .*

**Proof.** See e.g., Billingsley [13, Thm. 17.2]. Note that a homeomorphism is (Borel) measurable since it is continuous [13, Thm. 13.2], so the definition of  $\Phi_{\#}[p_z]$  is valid.  $\square$

**Lemma 13.** *Let  $\mu$  be a random variable whose characteristic function is a.e. non-zero. For two functions  $f$  and  $f'$  on the same space, we have:  $f * p_{\mu} = f' * p_{\mu} \iff f = f'$  a.e., where  $(f * p_{\mu})(x) := \int f(x)p_{\mu}(x - \mu) d\mu$  denotes convolution.*

**Proof.** The function equality  $f * p_{\mu} = f' * p_{\mu}$  leads to the equality under Fourier transformation  $\mathcal{F}[f * p_{\mu}] = \mathcal{F}[f' * p_{\mu}]$ , which gives  $\mathcal{F}[f]\mathcal{F}[p_{\mu}] = \mathcal{F}[f']\mathcal{F}[p_{\mu}]$ . Since  $\mathcal{F}[p_{\mu}]$  is the characteristic function of  $p_{\mu}$ , the condition that it is a.e. non-zero indicates that  $\mathcal{F}[f] = \mathcal{F}[f']$  a.e. thus  $f = f'$  a.e. See also Khemakhem et al. [57, Thm. 1].  $\square$

## A.1 Proof of the Equivalence Relation

**Proposition 14.** *The semantic-equivalence in Def. 10 is an equivalence relation if  $\mathcal{V}$  is connected and is either open or closed in  $\mathbb{R}^{dv}$ .*

**Proof.** Let  $\Phi$  be a semantic-preserving reparameterization from one CSG  $p = \langle p(s, v), p(x|s, v), p(y|s) \rangle$  to another  $p' = \langle p'(s, v), p'(x|s, v), p'(y|s) \rangle$ . It has its  $\Phi^{\mathcal{S}}$  constant of  $v$ , so we can write  $\Phi(s, v) = (\Phi^{\mathcal{S}}(s), \Phi^{\mathcal{V}}(s, v)) =: (\phi(s), \psi_s(v))$ .

(1) We first show that  $\phi$ , and  $\psi_s$  for any  $s \in \mathcal{S}$ , are homeomorphisms on  $\mathcal{S}$  and  $\mathcal{V}$ , respectively, and that  $\Phi^{-1}(s', v') = (\phi^{-1}(s'), \psi_{\phi^{-1}(s')}^{-1}(v'))$ .

- Since  $\Phi(\mathcal{S} \times \mathcal{V}) = \mathcal{S} \times \mathcal{V}$ , so  $\phi(\mathcal{S}) = \Phi^{\mathcal{S}}(\mathcal{S}) = \mathcal{S}$ , so  $\phi$  is surjective.
- Suppose that there exists  $s' \in \mathcal{S}$  such that  $\phi^{-1}(s') = \{s^{(i)}\}_{i \in \mathcal{I}}$  contains multiple distinct elements.
  1. Since  $\Phi$  is surjective, for any  $v' \in \mathcal{V}$ , there exist  $i \in \mathcal{I}$  and  $v \in \mathcal{V}$  such that  $(s', v') = \Phi(s^{(i)}, v) = (\phi(s^{(i)}), \psi_{s^{(i)}}(v))$ , which means that  $\bigcup_{i \in \mathcal{I}} \psi_{s^{(i)}}(\mathcal{V}) = \mathcal{V}$ .
  2. Since  $\Phi$  is injective, the sets  $\{\psi_{s^{(i)}}(\mathcal{V})\}_{i \in \mathcal{I}}$  must be mutually disjoint. Otherwise, there would exist  $i \neq j \in \mathcal{I}$  and  $v^{(1)}, v^{(2)} \in \mathcal{V}$  such that  $\psi_{s^{(i)}}(v^{(1)}) = \psi_{s^{(j)}}(v^{(2)})$  thus  $\Phi(s^{(i)}, v^{(1)}) = (s', \psi_{s^{(i)}}(v^{(1)})) = (s', \psi_{s^{(j)}}(v^{(2)})) = \Phi(s^{(j)}, v^{(2)})$ , which violates the injectivity of  $\Phi$  since  $s^{(i)} \neq s^{(j)}$ .
  3. In the case where  $\mathcal{V}$  is open, then so is any  $\psi_{s^{(i)}}(\mathcal{V}) = \Phi(s^{(i)}, \mathcal{V})$  since  $\Phi$  is continuous. But the union of disjoint open sets  $\bigcup_{i \in \mathcal{I}} \psi_{s^{(i)}}(\mathcal{V}) = \mathcal{V}$  cannot be connected. This violates the condition that  $\mathcal{V}$  is connected.
  4. A similar argument holds in the case where  $\mathcal{V}$  is closed.

So  $\phi^{-1}(s')$  contains only one unique element for any  $s' \in \mathcal{S}$ . So  $\phi$  is injective.

- The above argument also shows that for any  $s' \in \mathcal{S}$ , we have  $\bigcup_{i \in \mathcal{I}} \psi_{s^{(i)}}(\mathcal{V}) = \psi_{\phi^{-1}(s')}(\mathcal{V}) = \mathcal{V}$ . For any  $s \in \mathcal{S}$ , there exists  $s' \in \mathcal{S}$  such that  $s = \phi^{-1}(s')$ , so we have  $\psi_s(\mathcal{V}) = \mathcal{V}$ . So  $\psi_s$  is surjective for any  $s \in \mathcal{S}$ .
- Suppose that there exist  $v^{(1)} \neq v^{(2)} \in \mathcal{V}$  such that  $\psi_s(v^{(1)}) = \psi_s(v^{(2)})$ . Then  $\Phi(s, v^{(1)}) = (\phi(s), \psi_s(v^{(1)})) = (\phi(s), \psi_s(v^{(2)})) = \Phi(s, v^{(2)})$ , which contradicts the injectivity of  $\Phi$  since  $v^{(1)} \neq v^{(2)}$ . So  $\psi_s$  is injective for any  $s \in \mathcal{S}$ .
- That  $\Phi$  is continuous and  $\Phi(s, v) = (\phi(s), \psi_s(v))$  indicates that  $\phi$  and  $\psi_s$  are continuous. For any  $(s', v') \in \mathcal{S} \times \mathcal{V}$ , we have  $\Phi(\phi^{-1}(s'), \psi_{\phi^{-1}(s')}^{-1}(v')) = (\phi(\phi^{-1}(s')), \psi_{\phi^{-1}(s')}(\psi_{\phi^{-1}(s')}^{-1}(v'))) = (s', v')$ . Applying  $\Phi^{-1}$  to both sides gives  $\Phi^{-1}(s', v') = (\phi^{-1}(s'), \psi_{\phi^{-1}(s')}^{-1}(v'))$ .
- Since  $\Phi^{-1}$  is continuous,  $\phi^{-1}$  and  $\psi_s^{-1}$  are also continuous.

(2) We now show that the relation is an equivalence relation. It amounts to showing the following three properties.

- Reflexivity. For two identical CSGs, we have  $p(s, v) = p'(s, v)$ ,  $p(x|s, v) = p'(x|s, v)$  and  $p(y|s) = p'(y|s)$ . So the identity map as  $\Phi$  obviously satisfies all the requirements.
- Symmetry. Let  $\Phi$  be a semantic-preserving reparameterization from  $p = \langle p(s, v), p(x|s, v), p(y|s) \rangle$  to  $p' = \langle p'(s, v), p'(x|s, v), p'(y|s) \rangle$ . From the above conclusion in (1), we know that  $(\Phi^{-1})^S(s', v') = \phi^{-1}(s')$  is semantic-preserving. Also,  $\Phi^{-1}$  is a homeomorphism on  $\mathcal{S} \times \mathcal{V}$  since  $\Phi$  is. So we only need to show that  $\Phi^{-1}$  is a reparameterization from  $p'$  to  $p$  for symmetry.

1. From the definition of pushed-forward distribution, we have  $\Phi_{\#}^{-1}[p'_{s,v}] = p_{s,v}$  if  $\Phi_{\#}[p_{s,v}] = p'_{s,v}$ . It can also be verified through the rule of change of variables (Lemma 12) when  $\Phi$  and  $\Phi^{-1}$  are differentiable. From  $\Phi_{\#}[p_{s,v}] = p'_{s,v}$ , we have for any  $(s', v')$ ,  $p_{s,v}(\Phi^{-1}(s', v'))|J_{\Phi^{-1}}(s', v')| = p'_{s,v}(s', v')$ . Since for any  $(s, v)$  there exists  $(s', v')$  such that  $(s, v) = \Phi^{-1}(s', v')$ , this implies that for any  $(s, v)$ ,  $p_{s,v}(s, v)|J_{\Phi^{-1}}(\Phi(s, v))| = p'_{s,v}(\Phi(s, v))$ , or  $p_{s,v}(s, v) = p'_{s,v}(\Phi(s, v))/|J_{\Phi^{-1}}(\Phi(s, v))| = p'_{s,v}(\Phi(s, v))|J_{\Phi}(s, v)|$  (inverse function theorem), which means that  $p_{s,v} = \Phi_{\#}^{-1}[p'_{s,v}]$  by the rule of change of variables.

2. For any  $(s', v')$ , there exists  $(s, v)$  such that  $(s', v') = \Phi(s, v)$ , so  $p'(x|s', v') = p'(x|\Phi(s, v)) = p(x|s, v) = p(x|\Phi^{-1}(s', v'))$ , and  $p'(y|s') = p'(y|\Phi^S(s)) = p(y|s) = p(y|(\Phi^{-1})^S(s'))$ .

So  $\Phi^{-1}$  is a reparameterization from  $p'$  to  $p$ .

- Transitivity. Given a third CSG  $p'' = \langle p''(s, v), p''(x|s, v), p''(y|s) \rangle$  that is semantic-equivalent to  $p'$ , there exists a semantic-preserving reparameterization  $\Phi'$  from  $p'$  to  $p''$ . It is easy to see that  $(\Phi' \circ \Phi)^S(s, v) = \Phi'^S(\Phi^S(s, v)) = \Phi'^S(\Phi^S(s))$  is constant of  $v$  thus semantic-preserving. As the composition of two homeomorphisms  $\Phi$  and  $\Phi'$  on  $\mathcal{S} \times \mathcal{V}$ ,  $\Phi' \circ \Phi$  is also a homeomorphism. So we only need to show that  $\Phi' \circ \Phi$  is a reparameterization from  $p$  to  $p''$  for transitivity.

1. From the definition of pushed-forward distribution, we have  $(\Phi' \circ \Phi)_{\#}[p_{s,v}] = \Phi'_{\#}[\Phi_{\#}[p_{s,v}]] = \Phi'_{\#}[p'_{s,v}] = p''_{s,v}$  if  $\Phi_{\#}[p_{s,v}] = p'_{s,v}$  and  $\Phi'_{\#}[p'_{s,v}] = p''_{s,v}$ . It can also be verified through the rule of change of variables (Lemma 12) when  $\Phi^{-1}$  and  $\Phi'^{-1}$  are differentiable. For any  $(s'', v'')$ , we have

$$\begin{aligned} (\Phi' \circ \Phi)_{\#}[p_{s,v}](s'', v'') &= p_{s,v}((\Phi' \circ \Phi)^{-1}(s'', v''))|J_{(\Phi' \circ \Phi)^{-1}}(s'', v'')| \\ &= p_{s,v}(\Phi^{-1}(\Phi'^{-1}(s'', v'')))|J_{\Phi^{-1}}(\Phi'^{-1}(s'', v''))||J_{\Phi'^{-1}}(s'', v'')| \\ &= \Phi_{\#}[p_{s,v}](\Phi'^{-1}(s'', v''))|J_{\Phi'^{-1}}(s'', v'')| \\ &= p'_{s,v}(\Phi'^{-1}(s'', v''))|J_{\Phi'^{-1}}(s'', v'')| = \Phi'_{\#}[p'_{s,v}](s'', v'') = p''_{s,v}(s'', v''). \end{aligned}$$

2. For any  $(s, v)$ , we have:

$$\begin{aligned} p(x|s, v) &= p'(x|\Phi(s, v)) = p''(x|\Phi'(\Phi(s, v))) = p''(x|(\Phi' \circ \Phi)(s, v)), \\ p(y|s) &= p'(y|\Phi^S(s)) = p''(y|\Phi'^S(\Phi^S(s))) = p''(y|(\Phi' \circ \Phi)^S(s)). \end{aligned}$$

So  $\Phi' \circ \Phi$  is a reparameterization from  $p$  to  $p''$ .

This completes the proof for an equivalence relation.  $\square$

## A.2 Proof of the Semantic-Identifiability Thm. 5

We present a more general and detailed version of Thm. 5 and prove it. The conclusions in the theorem in the main context corresponds to conclusions (ii) and (i) below by taking the two CSGs  $p'$  and  $p$  as the well-learned CSG  $p$  and the ground-truth CSG  $p^*$ , respectively.

**Theorem 5'** (semantic-identifiability). *Consider two CSGs  $p$  and  $p'$  that have Assumption 3 hold, with the bounded derivative conditions specified to be that for both CSGs,  $f^{-1}$  and  $g$  are twice and  $f$  thrice differentiable with mentioned derivatives bounded. Further assume that they have absolutely continuous priors whose log-densities  $\log p(s, v)$  and  $\log p'(s, v)$  are bounded up to the second-order. If the two CSGs induce the same distribution on data, i.e.  $p(x, y) = p'(x, y)$ , then they*

are semantic-equivalent, under **one of** the following three conditions:<sup>12</sup>

(i)  $p_\mu$  has an a.e. non-zero characteristic function (e.g., a Gaussian distribution);<sup>13</sup>

(ii)  $\frac{1}{\sigma_\mu^2} \rightarrow \infty$ , where  $\sigma_\mu^2 := \mathbb{E}[\mu^\top \mu]$ ;

(iii)  $\frac{1}{\sigma_\mu^2} \gg B_{f^{-1}}'^2 \max\{B_{\log p}' B_g' + \frac{1}{2} B_g'' + \frac{3}{2} d B_{f^{-1}}' B_f'' B_g', B_p B_{f^{-1}}'^d (B_{\log p}'^2 + B_{\log p}'' + 3d B_{f^{-1}}' B_f'' B_{\log p}' + 3d^{\frac{3}{2}} B_{f^{-1}}'^2 B_f''^2 + d^3 B_f''' B_{f^{-1}}')\}$ , where  $d := d_S + d_V$ , and for both CSGs, the constant  $B_p$  bounds  $p(s, v)$ ,  $B_{f^{-1}}'$ ,  $B_g'$ ,  $B_{\log p}'$  and  $B_f''$ ,  $B_g''$ ,  $B_{\log p}''$  bound the 2-norms<sup>14</sup> of the gradient/Jacobian and the Hessians of the respective functions, and  $B_f'''$  bounds all the 3rd-order derivatives of  $f$ .

**Proof.** Without loss of generality, we assume that  $\mu$  and  $\nu$  (for continuous  $y$ ) have zero mean. If it is not, we can redefine  $f(s, v) := f(s, v) + \mathbb{E}[\mu]$  and  $\mu := \mu - \mathbb{E}[\mu]$  (similarly for  $\nu$  for continuous  $y$ ) which does not alter the joint distribution  $p(s, v, x, y)$  nor violates any assumptions. Also without loss of generality, we consider one scalar component (dimension)  $l$  of  $y$ , and abuse the use of symbols  $y$  and  $g$  for  $y_l$  and  $g_l$  to avoid unnecessary complication. Note that for continuous  $y$ , due to the additive noise structure  $y = g(s) + \nu$  and that  $\nu$  has zero mean, we also have  $\mathbb{E}[y|s] = g(s)$  as the same as the categorical  $y$  case (under the one-hot representation). We sometimes denote  $z := (s, v)$  for convenience.

First note that for both CSGs and both continuous and categorical  $y$ , by construction  $g(s)$  is a sufficient statistics of  $p(y|s)$  (not only the expectation  $\mathbb{E}[y|s]$ ), and it is injective. So by Lemma 11, we only need to show that there exists a reparameterization from  $p$  to  $p'$ . We will show that  $\Phi := f'^{-1} \circ f$  is such a reparameterization.

Since  $f$  and  $f'$  are bijective and continuous, we have  $\Phi^{-1} = f^{-1} \circ f'$ , so  $\Phi$  is bijective and  $\Phi$  and  $\Phi^{-1}$  are continuous. So  $\Phi$  is a homeomorphism. Also, by construction, we have:

$$p(x|z) = p_\mu(x - f(z)) = p_\mu(x - f'(f'^{-1}(f(z)))) = p_\mu(x - f'(\Phi(z))) = p'(x|\Phi(z)). \quad (7)$$

So we only need to show that  $p(x, y) = p'(x, y)$  indicates  $\Phi_\# [p_z] = p'_z$  and  $p(y|s) = p'(y|\Phi^S(s, v))$ ,  $\forall v \in \mathcal{V}$  under the conditions.

**Proof under condition (i).** We begin with a useful reformulation of the integral  $\int t(z)p(x|z) dz$  for a general function  $t$  of  $z$ . We will encounter integrals in this form. By the additive noise Assumption 3, we have  $p(x|z) = p_\mu(x - f(z))$ , so we consider a transformation  $\Psi_x(z) := x - f(z)$  and let  $\mu = \Psi_x(z)$ . It is invertible,  $\Psi_x^{-1}(\mu) = f^{-1}(x - \mu)$ , and  $J_{\Psi_x^{-1}}(\mu) = -J_{f^{-1}}(x - \mu)$ . By these definitions and the rule of change of variables, we have:

$$\begin{aligned} \int t(z)p(x|z) dz &= \int t(z)p_\mu(\Psi_x(z)) dz = \int t(\Psi_x^{-1}(\mu))p(\mu) \left| J_{\Psi_x^{-1}}(\mu) \right| d\mu \\ &= \int t(f^{-1}(x - \mu))p(\mu) \left| J_{f^{-1}}(x - \mu) \right| d\mu \\ &= \mathbb{E}_{p(\mu)}[(\bar{t}V)(x - \mu)] \\ &= (f_\#[t] * p_\mu)(x), \end{aligned} \quad (8)$$

$$(9)$$

where we have denoted functions  $\bar{t} := t \circ f^{-1}$ ,  $V := |J_{f^{-1}}|$ , and abused the push-forward notation  $f_\#[t]$  for a general function  $t$  to formally denote  $(t \circ f^{-1})|J_{f^{-1}}| = \bar{t}V$ .

According to the graphical structure of CSG, we have:

$$p(x) = \int p(z)p(x|z) dz, \quad (10)$$

$$\mathbb{E}[y|x] = \frac{1}{p(x)} \int yp(x, y) dy = \frac{1}{p(x)} \iint yp(z)p(x|z)p(y|s) dz dy$$

<sup>12</sup>To be precise, the conclusions are that the equalities in Def. 10 hold a.e. for condition (i), hold asymptotically in the limit  $\frac{1}{\sigma_\mu^2} \rightarrow \infty$  for condition (ii), and hold up to a negligible quantity for condition (iii).

<sup>13</sup>This also requires that  $p$  and  $p'$  have the same  $p_\mu$ , or that the ground-truth  $p_\mu$  is known in learning. However,  $p_\mu$  is easier to model/specify/learn than  $f$ , and  $f$  dominates  $p(x|s, v)$  over  $p_\mu$  when the causal mechanism tends to be strong. So learning or specifying  $p_\mu$  in learning is not a significant violation of this requirement.

<sup>14</sup>As an induced operator norm for matrices (not the Frobenius norm).

$$= \frac{1}{p(x)} \int p(z)p(x|z)\mathbb{E}[y|s] dz = \frac{1}{p(x)} \int g(s)p(z)p(x|z) dz. \quad (11)$$

So from Eq. (9), we have:

$$p(x) = (f_{\#}[p_z] * p_{\mu})(x), \quad \mathbb{E}[y|x] = \frac{1}{p(x)}(f_{\#}[gp_z] * p_{\mu})(x). \quad (12)$$

Matching the data distribution  $p(x, y) = p'(x, y)$  indicates both  $p(x) = p'(x)$  and  $\mathbb{E}[y|x] = \mathbb{E}'[y|x]$ . Using Lemma 13 under condition (i), this further indicates:

$$f_{\#}[p_z] = f'_{\#}[p'_z] \text{ a.e.}, \quad f_{\#}[gp_z] = f'_{\#}[g'p'_z] \text{ a.e.},$$

given that  $p$  and  $p'$  have the same  $p_{\mu}$ . The former indicates  $\Phi_{\#}[p_z] = p'_z$ . The latter can be reformed as  $\bar{g}f_{\#}[p_z] = \bar{g}'f'_{\#}[p'_z]$  a.e., so  $\bar{g} = \bar{g}'$  a.e., where we have denoted  $\bar{g} := g \circ (f^{-1})^S$  and  $\bar{g}' := g' \circ (f'^{-1})^S$  similarly. From  $\bar{g} = \bar{g}'$ , we have for any  $v \in \mathcal{V}$ ,

$$\begin{aligned} g(s) &= g((f^{-1} \circ f)^S(s, v)) = g((f^{-1})^S(f(s, v))) = \bar{g}(f(s, v)) \\ &= \bar{g}'(f(s, v)) = g'((f'^{-1})^S(f(s, v))) = g'(\Phi^S(s, v)). \end{aligned} \quad (13)$$

For both continuous and categorical  $y$ ,  $g(s)$  uniquely determines  $p(y|s)$ . So the above equality means that  $p(y|s) = p'(y|\Phi^S(s, v))$  for any  $v \in \mathcal{V}$ .

**Proof under condition (ii).** Applying Eq. (8) to Eqs. (10, 11) (or expanding Eq. (12)), we have:

$$p(x) = \mathbb{E}_{p(\mu)}[(\bar{p}_z V)(x - \mu)], \quad \mathbb{E}[y|x] = \frac{1}{p(x)} \mathbb{E}_{p(\mu)}[(\bar{g}\bar{p}_z V)(x - \mu)],$$

where we have similarly denoted  $\bar{p}_z := p_z \circ f^{-1}$ . Under condition (ii),  $\mathbb{E}[\mu^{\top} \mu]$  is infinitesimal, so we can expand the expressions w.r.t  $\mu$ . For  $p(x)$ , we have:

$$\begin{aligned} p(x) &= \mathbb{E}_{p(\mu)}[\bar{p}_z V - \nabla(\bar{p}_z V)^{\top} \mu + \frac{1}{2} \mu^{\top} \nabla \nabla^{\top} (\bar{p}_z V) \mu + O(\mathbb{E}[\|\mu\|_2^3])] \\ &= \bar{p}_z V + \frac{1}{2} \mathbb{E}_{p(\mu)}[\mu^{\top} \nabla \nabla^{\top} (\bar{p}_z V) \mu] + O(\sigma_{\mu}^3), \end{aligned}$$

where all functions are evaluated at  $x$ . For  $\mathbb{E}[y|x]$ , we first expand  $1/p(x)$  using  $\frac{1}{x+\varepsilon} = \frac{1}{x} - \frac{\varepsilon}{x^2} + O(\varepsilon^2)$  to get:  $\frac{1}{p(x)} = \frac{1}{\bar{p}_z V} - \frac{1}{2\bar{p}_z^2 V^2} \mathbb{E}_{p(\mu)}[\mu^{\top} \nabla \nabla^{\top} (\bar{p}_z V) \mu] + O(\sigma_{\mu}^3)$ . The second term is expanded as:  $\bar{g}\bar{p}_z V + \frac{1}{2} \mathbb{E}_{p(\mu)}[\mu^{\top} \nabla \nabla^{\top} (\bar{g}\bar{p}_z V) \mu] + O(\sigma_{\mu}^3)$ . Combining the two parts, we have:

$$\mathbb{E}[y|x] = \bar{g} + \frac{1}{2} \mathbb{E}_{p(\mu)}[\mu^{\top} ((\nabla \log \bar{p}_z V) \nabla \bar{g}^{\top} + \nabla \bar{g} (\nabla \log \bar{p}_z V)^{\top} + \nabla \nabla^{\top} \bar{g}) \mu] + O(\sigma_{\mu}^3). \quad (14)$$

This equation holds for any  $x \in \text{supp}(p_x)$  since the expectation is taken w.r.t the distribution  $p(x, y)$ . Since  $p(x, y) = p'(x, y)$ , the considered  $x$  here is any value generated by the model. So up to  $O(\sigma_{\mu}^2)$ ,

$$\begin{aligned} |p(x) - (\bar{p}_z V)(x)| &= \frac{1}{2} |\mathbb{E}_{p(\mu)}[\mu^{\top} \nabla \nabla^{\top} (\bar{p}_z V) \mu]| \leq \frac{1}{2} \mathbb{E}_{p(\mu)}[|\mu^{\top} \nabla \nabla^{\top} (\bar{p}_z V) \mu|] \\ &\leq \frac{1}{2} \mathbb{E}_{p(\mu)}[\|\mu\|_2 \|\nabla \nabla^{\top} (\bar{p}_z V)\|_2 \|\mu\|_2] = \frac{1}{2} \mathbb{E}[\mu^{\top} \mu] \|\nabla \nabla^{\top} (\bar{p}_z V)\|_2 \\ &= \frac{1}{2} \mathbb{E}[\mu^{\top} \mu] |\bar{p}_z V| \|\nabla \nabla^{\top} \log \bar{p}_z V + (\nabla \log \bar{p}_z V)(\nabla \log \bar{p}_z V)^{\top}\|_2 \\ &\leq \frac{1}{2} \mathbb{E}[\mu^{\top} \mu] |\bar{p}_z V| (\|\nabla \nabla^{\top} \log \bar{p}_z V\|_2 + \|\nabla \log \bar{p}_z V\|_2^2), \end{aligned} \quad (15)$$

$$\begin{aligned} |\mathbb{E}[y|x] - \bar{g}(x)| &= \frac{1}{2} |\mathbb{E}_{p(\mu)}[\mu^{\top} ((\nabla \log \bar{p}_z V) \nabla \bar{g}^{\top} + \nabla \bar{g} (\nabla \log \bar{p}_z V)^{\top} + \nabla \nabla^{\top} \bar{g}) \mu]| \\ &\leq \frac{1}{2} \mathbb{E}_{p(\mu)}[|\mu^{\top} ((\nabla \log \bar{p}_z V) \nabla \bar{g}^{\top} + \nabla \bar{g} (\nabla \log \bar{p}_z V)^{\top} + \nabla \nabla^{\top} \bar{g}) \mu|] \\ &\leq \frac{1}{2} \mathbb{E}_{p(\mu)}[\|\mu\|_2 \|\nabla \log \bar{p}_z V\|_2 \|\nabla \bar{g}^{\top} + \nabla \bar{g} (\nabla \log \bar{p}_z V)^{\top} + \nabla \nabla^{\top} \bar{g}\|_2 \|\mu\|_2] \\ &\leq \frac{1}{2} \mathbb{E}[\mu^{\top} \mu] (\|\nabla \log \bar{p}_z V\|_2 \|\nabla \bar{g}^{\top}\|_2 + \|\nabla \bar{g} (\nabla \log \bar{p}_z V)^{\top}\|_2 + \|\nabla \nabla^{\top} \bar{g}\|_2) \\ &= \mathbb{E}[\mu^{\top} \mu] \left( \|\nabla \log \bar{p}_z V\|_2 \|\nabla \bar{g}\|_2 + \frac{1}{2} \|\nabla \nabla^{\top} \bar{g}\|_2 \right). \end{aligned} \quad (16)$$

Given the bounding conditions in the theorem, the multiplicative factors to  $\mathbb{E}[\mu^\top \mu]$  in the last expressions are bounded by a constant. So when  $\frac{1}{\sigma_\mu^2} \rightarrow \infty$ , *i.e.*  $\mathbb{E}[\mu^\top \mu] \rightarrow 0$ , we have  $p(x)$  and  $\mathbb{E}[y|x]$  converge uniformly to  $(\bar{p}_z V)(x) = f_{\#}[p_z](x)$  and  $\bar{g}(x)$ , respectively. So  $p(x, y) = p'(x, y)$  indicates  $f_{\#}[p_z] = f'_{\#}[p'_z]$  and  $\bar{g} = \bar{g}'$ , which means  $\Phi_{\#}[p_z] = p'_z$  and  $p(y|s) = p'(y|\Phi^S(s, v))$  for any  $v \in \mathcal{V}$ , due to Eq. (13) and the explanation that follows.

**Proof under condition (iii).** We only need to show that when  $\frac{1}{\sigma_\mu^2}$  is much larger than the given quantity, we still have  $p(x, y) = p'(x, y) \implies \bar{p}_z V = \bar{p}'_z V', \bar{g} = \bar{g}'$  up to a negligible effect. This task amounts to showing that the residuals  $|p(x) - (\bar{p}_z V)(x)|$  and  $|\mathbb{E}[y|x] - \bar{g}(x)|$  controlled by Eqs. (15, 16) are negligible. To achieve this, we need to further expand the controlling functions using derivatives of  $f, g$  and  $p_z$  explicitly, and bound them by the bounding constants. In the following, we use indices  $a, b, c$  for the components of  $x$  and  $i, j, k$  for those of  $z$ . For functions of  $z$  appearing in the following (*e.g.*,  $f, g, p_z$  and their derivatives), they are evaluated at  $z = f^{-1}(x)$  since we are bounding functions of  $x$ .

**(1) Bounding  $|\mathbb{E}[y|x] - \bar{g}(x)| \leq \mathbb{E}[\mu^\top \mu] (|\nabla \log \bar{p}_z V| + \frac{1}{2} \|\nabla \nabla^\top \bar{g}\|_2)$**  from Eq. (16).

From the chain rule of differentiation, it is easy to show that:

$$\nabla \log \bar{p}_z = J_{f^{-1}} \nabla \log p_z, \quad \nabla \bar{g} = J_{(f^{-1})s} \nabla g = J_{f^{-1}} \nabla_z g, \quad (17)$$

where  $\nabla_z g = (\nabla g^\top, 0_{d_y}^\top)^\top$  (recall that  $g$  is a function only of  $s$ ). For the term  $\nabla \log V$ , we apply Jacobi's formula for the derivative of the log-determinant:

$$\begin{aligned} \partial_a \log V(x) &= \partial_a \log |J_{f^{-1}}(x)| = \text{tr} \left( J_{f^{-1}}^{-1}(x) (\partial_a J_{f^{-1}}(x)) \right) = \sum_{b,i} J_{f^{-1}}^{-1}(x)_{ib} (\partial_a J_{f^{-1}}(x)_{bi}) \\ &= \sum_{b,i} J_f(f^{-1}(x))_{ib} \partial_b \partial_a f_i^{-1}(x) = \sum_i (J_f(\nabla \nabla^\top f_i^{-1}))_{ia}. \end{aligned} \quad (18)$$

However, as bounding Eq. (17) already requires bounding  $\|J_{f^{-1}}\|_2$ , directly using this expression to bound  $\|\nabla \log V\|_2$  would require to also bound  $\|J_f\|_2$ . This requirement to bound the first-order derivatives of both  $f$  and  $f^{-1}$  is a relatively restrictive one. To ease the requirement, we would like to express  $\nabla \log V$  in terms of  $J_{f^{-1}}$ . This can be achieved by expressing  $\nabla \nabla^\top f_i^{-1}$ 's in terms of  $\nabla \nabla^\top f_c$ 's. To do this, first consider a general invertible-matrix-valued function  $A(\alpha)$  on a scalar  $\alpha$ . We have  $0 = \partial_\alpha (A(\alpha)^{-1} A(\alpha)) = (\partial_\alpha A^{-1}) A + A^{-1} \partial_\alpha A$ , so we have  $A^{-1} \partial_\alpha A = -(\partial_\alpha A^{-1}) A$ , consequently  $\partial_\alpha A = -A(\partial_\alpha A^{-1}) A$ . Using this relation (in the fourth equality below), we have:

$$\begin{aligned} (\nabla \nabla^\top f_i^{-1})_{ab} &= \partial_a \partial_b f_i^{-1} = \partial_a (J_{f^{-1}})_{bi} = (\partial_a J_{f^{-1}})_{bi} \\ &= - \left( J_{f^{-1}} (\partial_a J_{f^{-1}}) J_{f^{-1}} \right)_{bi} = - \left( J_{f^{-1}} (\partial_a J_f) J_{f^{-1}} \right)_{bi} \\ &= - \sum_{jc} (J_{f^{-1}})_{bj} (\partial_a (\partial_j f_c)) (J_{f^{-1}})_{ci} = - \sum_{jck} (J_{f^{-1}})_{bj} (\partial_k \partial_j f_c) (\partial_a f_k^{-1}) (J_{f^{-1}})_{ci} \\ &= - \sum_c (J_{f^{-1}})_{ci} \sum_{jk} (J_{f^{-1}})_{bj} (\partial_k \partial_j f_c) (J_{f^{-1}})_{ak} = - \sum_c (J_{f^{-1}})_{ci} (J_{f^{-1}} (\nabla \nabla^\top f_c) J_{f^{-1}}^\top)_{ab}, \end{aligned}$$

or in matrix form,

$$\nabla \nabla^\top f_i^{-1} = - \sum_c (J_{f^{-1}})_{ci} J_{f^{-1}} (\nabla \nabla^\top f_c) J_{f^{-1}}^\top =: - \sum_c (J_{f^{-1}})_{ci} K^c, \quad (19)$$

where we have defined the matrix  $K^c := J_{f^{-1}} (\nabla \nabla^\top f_c) J_{f^{-1}}^\top$  which is symmetric. Substituting with this result, we can transform Eq. (18) into a desired form:

$$\begin{aligned} \nabla \log V(x) &= \sum_i (J_f(\nabla \nabla^\top f_i^{-1}))_{i:}^\top = - \sum_i \left( J_f \sum_c (J_{f^{-1}})_{ci} J_{f^{-1}} (\nabla \nabla^\top f_c) J_{f^{-1}}^\top \right)_{i:}^\top \\ &= - \sum_i \left( \sum_c (J_{f^{-1}})_{ci} J_f J_{f^{-1}}^{-1} (\nabla \nabla^\top f_c) J_{f^{-1}}^\top \right)_{i:}^\top = - \sum_{ci} (J_{f^{-1}})_{ci} \left( (\nabla \nabla^\top f_c) J_{f^{-1}}^\top \right)_{i:}^\top \\ &= - \sum_c \left( J_{f^{-1}} (\nabla \nabla^\top f_c) J_{f^{-1}}^\top \right)_{c:}^\top = - \sum_c (K^c)^\top = - \sum_c K^c, \end{aligned} \quad (20)$$

so its norm can be bounded by:

$$\begin{aligned}
\|\nabla \log V(x)\|_2 &= \left\| \sum_c K_c^c \right\|_2 = \left\| \sum_c (J_{f^{-1}})_{c:} (\nabla \nabla^\top f_c) J_{f^{-1}}^\top \right\|_2 \\
&\leq \sum_c \|(J_{f^{-1}})_{c:}\|_2 \|\nabla \nabla^\top f_c\|_2 \|J_{f^{-1}}\|_2 \leq B_f'' B_{f^{-1}}' \sum_c \|(J_{f^{-1}})_{c:}\|_2 \\
&\leq dB_{f^{-1}}'^2 B_f'', \tag{21}
\end{aligned}$$

where we have used the following result in the last inequality:

$$\sum_c \|(J_{f^{-1}})_{c:}\|_2 \leq d^{1/2} \sqrt{\sum_c \|(J_{f^{-1}})_{c:}\|_2^2} = d^{1/2} \|J_{f^{-1}}\|_F \leq d \|J_{f^{-1}}\|_2 \leq dB_{f^{-1}}'. \tag{22}$$

Integrating Eq. (17) and Eq. (21), we have:

$$\begin{aligned}
|(\nabla \log \bar{p}_z V)^\top \nabla \bar{g}| &= (J_{f^{-1}} \nabla \log p_z + \nabla \log V)^\top J_{f^{-1}} \nabla_z g \\
&\leq (\|J_{f^{-1}}\|_2 \|\nabla \log p_z\|_2 + \|\nabla \log V\|_2) \|J_{f^{-1}}\|_2 \|\nabla g\|_2 \\
&\leq (B_{f^{-1}}' B_{\log p}' + dB_{f^{-1}}'^2 B_f'') B_{f^{-1}}' B_g' \\
&= (B_{\log p}' + dB_{f^{-1}}' B_f'') B_{f^{-1}}' B_g'. \tag{23}
\end{aligned}$$

For the Hessian of  $\bar{g}$ , direct calculus gives:

$$\begin{aligned}
\nabla \nabla^\top \bar{g} &= J_{(f^{-1})S} (\nabla \nabla^\top g) J_{(f^{-1})S}^\top + \sum_{i=1}^{d_S} (\nabla g)_{s_i} (\nabla \nabla^\top f_{s_i}^{-1}) \\
&= J_{f^{-1}} (\nabla_z \nabla_z^\top g) J_{f^{-1}}^\top + \sum_i (\nabla_z g)_i (\nabla \nabla^\top f_i^{-1}).
\end{aligned}$$

To avoid the requirement of bounding both  $\nabla \nabla^\top f_c$ 's and  $\nabla \nabla^\top f_i^{-1}$ 's, we substitute  $\nabla \nabla^\top f_i^{-1}$  using Eq. (19):

$$\begin{aligned}
\nabla \nabla^\top \bar{g} &= J_{f^{-1}} (\nabla_z \nabla_z^\top g) J_{f^{-1}}^\top - \sum_i (\nabla_z g)_i \sum_c (J_{f^{-1}})_{ci} K^c \\
&= J_{f^{-1}} (\nabla_z \nabla_z^\top g) J_{f^{-1}}^\top - \sum_c \left( (J_{f^{-1}})_{c:}, (\nabla_z g) \right) K^c.
\end{aligned}$$

So its norm can be bounded by:

$$\begin{aligned}
\|\nabla \nabla^\top \bar{g}\|_2 &\leq \|J_{f^{-1}}\|_2^2 \|\nabla \nabla^\top g\|_2 + \sum_c |(J_{f^{-1}})_{c:} (\nabla_z g)| \|K^c\|_2 \\
&\leq B_{f^{-1}}'^2 B_g'' + \sum_c |(J_{f^{-1}})_{c:} (\nabla_z g)| B_{f^{-1}}'^2 B_f'' \\
&\leq B_{f^{-1}}'^2 \left( B_g'' + B_f'' \sum_c \|(J_{f^{-1}})_{c:}\|_2 \|\nabla_z g\|_2 \right) \\
&\leq B_{f^{-1}}'^2 \left( B_g'' + B_f'' B_g' \sum_c \|(J_{f^{-1}})_{c:}\|_2 \right) \\
&\leq B_{f^{-1}}'^2 \left( B_g'' + dB_{f^{-1}}' B_f'' B_g' \right), \tag{24}
\end{aligned}$$

where we have used Eq. (22) in the last inequality. Assembling Eq. (23) and Eq. (24) into Eq. (16), we have:

$$|\mathbb{E}[y|x] - \bar{g}(x)| \leq \mathbb{E}[\mu^\top \mu] B_{f^{-1}}'^2 \left( B_{\log p}' B_g' + \frac{1}{2} B_g'' + \frac{3}{2} dB_{f^{-1}}' B_f'' B_g' \right). \tag{25}$$

So given the condition **(iii)**, this residual can be neglected.

**(2) Bounding  $|p(x) - (\bar{p}_z V)(x)|$**   $\leq \frac{1}{2} \mathbb{E}[\mu^\top \mu] |\bar{p}_z V| (\|\nabla \log \bar{p}_z V\|_2^2 + \|\nabla \nabla^\top \log \bar{p}_z\|_2 + \|\nabla \nabla^\top \log V\|_2)$  from Eq. (15).

To begin with, for any  $x$ ,  $\bar{p}_z(x) = p_z(f^{-1}(x)) \leq B_p$ , and  $V(x) = |J_{f^{-1}}(x)|$  is the product of absolute eigenvalues of  $J_{f^{-1}}(x)$ . Since  $\|J_{f^{-1}}(x)\|_2$  is the largest absolute eigenvalue of  $J_{f^{-1}}(x)$ , so  $V(x) \leq \|J_{f^{-1}}(x)\|_2^d \leq B_{f^{-1}}^d$ .

For the first norm in the bracket of the r.h.s of Eq. (15), we have:

$$\begin{aligned} \|\nabla \log \bar{p}_z V\|_2^2 &= \|\nabla \log \bar{p}_z\|_2^2 + 2(\nabla \log \bar{p}_z)^\top \nabla \log V + \|\nabla \log V\|_2^2 \\ &\leq \|\nabla \log \bar{p}_z\|_2^2 + 2\|\nabla \log \bar{p}_z\|_2 \|\nabla \log V\|_2 + \|\nabla \log V\|_2^2 \\ &\leq B_{f^{-1}}'^2 B_{\log p}''^2 + 2dB_{f^{-1}}'^3 B_f'' B_{\log p}' + \|\nabla \log V\|_2^2, \end{aligned} \quad (26)$$

where we have utilized Eq. (17) and Eq. (21) in the last inequality. We consider bounding  $\|\nabla \log V\|_2^2$  separately. Using Eq. (20) (in the second equality below), we have:

$$\begin{aligned} \|\nabla \log V\|_2^2 &= |(\nabla \log V)^\top (\nabla \log V)| = \left| \sum_c (K_{:c}^c)^\top \sum_d K_{:d}^d \right| \\ &= \left| \sum_{cd} K_{c:}^c K_{:d}^d \right| \leq \sum_{cd} |K_{c:}^c K_{:d}^d| \\ &= \sum_{cd} \left| (J_{f^{-1}})_{c:} (\nabla \nabla^\top f_c) J_{f^{-1}}^\top J_{f^{-1}} (\nabla \nabla^\top f_d) (J_{f^{-1}})_{:d}^\top \right| \\ &\leq \sum_{cd} \left| (J_{f^{-1}})_{c:} (J_{f^{-1}})_{:d}^\top \right| \left\| (\nabla \nabla^\top f_c) J_{f^{-1}}^\top J_{f^{-1}} (\nabla \nabla^\top f_d) \right\|_2 \\ &\leq \sum_{cd} \left| (J_{f^{-1}})_{c:} (J_{f^{-1}})_{:d}^\top \right| B_{f^{-1}}''^2 B_f''^2 = B_{f^{-1}}''^2 B_f''^2 \sum_{cd} \left| (J_{f^{-1}} J_{f^{-1}}^\top)_{cd} \right| \\ &\leq d^{3/2} B_{f^{-1}}''^2 B_f''^2 \left\| J_{f^{-1}} J_{f^{-1}}^\top \right\|_2 \leq d^{3/2} B_{f^{-1}}'^4 B_f''^2, \end{aligned} \quad (27)$$

where we have used the facts for general matrix  $A$  and (column) vectors  $\alpha, \beta$  that

$$|\alpha^\top A \beta| = \|\alpha (A \beta)^\top\|_2 = \|\alpha \beta^\top A^\top\|_2 \leq \|\alpha \beta^\top\|_2 \|A\|_2 = |\alpha^\top \beta| \|A\|_2 \quad (28)$$

in the fifth last inequality, and that

$$\sum_{cd} |A_{cd}| \leq \sqrt{d^2} \sqrt{\sum_{cd} |A_{cd}|^2} = d \|A\|_F \leq d^{3/2} \|A\|_2 \quad (29)$$

in the second last inequality. Substituting Eq. (27) into Eq. (26), we have:

$$\|\nabla \log \bar{p}_z V\|_2^2 \leq B_{f^{-1}}''^2 B_{\log p}''^2 + 2dB_{f^{-1}}'^3 B_f'' B_{\log p}' + d^{3/2} B_{f^{-1}}'^4 B_f''^2. \quad (30)$$

For the second norm in the bracket of the r.h.s of Eq. (15), similar to Eq. (24), we have:

$$\|\nabla \nabla^\top \log \bar{p}_z\|_2 \leq B_{f^{-1}}''^2 (B_{\log p}'' + dB_{f^{-1}}' B_f'' B_{\log p}'). \quad (31)$$

The third norm  $\|\nabla \nabla^\top \log V\|_2$  in the bracket of the r.h.s of Eq. (15) needs some more effort. From Eq. (20), we have  $\partial_b \log V = -\sum_{cij} (J_{f^{-1}})_{ci} (\partial_i \partial_j f_c) (J_{f^{-1}})_{bj}$ , thus

$$\begin{aligned} \partial_a \partial_b \log V &= -\sum_{cij} \partial_a (J_{f^{-1}})_{ci} (\partial_i \partial_j f_c) (J_{f^{-1}})_{bj} - \sum_{cij} (J_{f^{-1}})_{ci} (\partial_i \partial_j f_c) \partial_a (J_{f^{-1}})_{bj} \\ &\quad - \sum_{cij} (J_{f^{-1}})_{ci} \partial_a (\partial_i \partial_j f_c) (J_{f^{-1}})_{bj} \\ &= -\sum_{cij} (\partial_a \partial_c f_i^{-1}) (\partial_i \partial_j f_c) (J_{f^{-1}})_{bj} - \sum_{cij} (J_{f^{-1}})_{ci} (\partial_i \partial_j f_c) (\partial_a \partial_b f_j^{-1}) \\ &\quad - \sum_{cij} (J_{f^{-1}})_{ci} (\partial_a f_k^{-1}) (\partial_k \partial_i \partial_j f_c) (J_{f^{-1}})_{bj} \end{aligned}$$



$$\begin{aligned}
&= \sum_{cijd} (J_{f-1})_{di} K_{ac}^d (\partial_i \partial_j f_c) (J_{-1})_{bj} + \sum_{cijd} (J_{f-1})_{ci} (\partial_i \partial_j f_c) (J_{f-1})_{dj} K_{ab}^d \\
&\quad - \sum_{cijk} (J_{f-1})_{ci} (\partial_k \partial_i \partial_j f_c) (J_{f-1})_{ak} (J_{f-1})_{bj} \\
&= \sum_{cd} K_{ac}^d K_{db}^c + \sum_{cd} K_{cd}^c K_{ab}^d - \sum_{cijk} (J_{f-1})_{ci} (\partial_k \partial_i \partial_j f_c) (J_{f-1})_{ak} (J_{f-1})_{bj},
\end{aligned}$$

where we have used Eq. (19) in the third equality for the first two terms. In matrix form, we have:

$$\nabla \nabla^\top \log V = \sum_{cd} K_{:c}^d K_{d:}^c + \sum_{cd} K_{cd}^c K^d - \sum_{cijk} (J_{f-1})_{ci} (\partial_k \partial_i \partial_j f_c) (J_{f-1})_{:k} (J_{f-1})_{:j}^\top.$$

We now bound the norms of the three terms in turn. For the first term,

$$\begin{aligned}
&\left\| \sum_{cd} K_{:c}^d K_{d:}^c \right\|_2 \leq \sum_{cd} \|K_{:c}^d K_{d:}^c\|_2 = \sum_{cd} |K_{d:}^c K_{:c}^d| \\
&= \sum_{cd} \left| (J_{f-1})_{:d} (\nabla \nabla^\top f_c) J_{f-1}^\top J_{f-1} (\nabla \nabla^\top f_d) (J_{f-1})_{c:}^\top \right| \\
&\leq \sum_{cd} \left| (J_{f-1})_{:d} (J_{f-1})_{c:}^\top \right| \left\| (\nabla \nabla^\top f_c) J_{f-1}^\top J_{f-1} (\nabla \nabla^\top f_d) \right\|_2 \\
&\leq B_{f-1}^{\prime 2} B_f^{\prime \prime 2} \sum_{cd} \left| (J_{f-1} J_{f-1}^\top)_{dc} \right| \leq d^{3/2} B_{f-1}^{\prime 2} B_f^{\prime \prime 2} \left\| J_{f-1} J_{f-1}^\top \right\|_2 \\
&\leq d^{3/2} B_{f-1}^{\prime 4} B_f^{\prime \prime 2}, \tag{32}
\end{aligned}$$

where we have used Eq. (28) in the fourth last inequality and Eq. (29) in the second last inequality. For the second term,

$$\begin{aligned}
&\left\| \sum_{cd} K_{cd}^c K^d \right\|_2 \leq \sum_{cd} |K_{cd}^c| \|K^d\|_2 \leq B_{f-1}^{\prime 2} B_f^{\prime \prime} \sum_{cd} |K_{cd}^c| \\
&\leq d^{1/2} B_{f-1}^{\prime 2} B_f^{\prime \prime} \sum_c \sqrt{\sum_d |K_{cd}^c|^2} = d^{1/2} B_{f-1}^{\prime 2} B_f^{\prime \prime} \sum_c \|K_{c:}^c\|_2 \\
&\leq d^{1/2} B_{f-1}^{\prime 2} B_f^{\prime \prime} \sum_c \left\| (J_{f-1})_{c:} \right\|_2 \left\| (\nabla \nabla^\top f_c) J_{f-1}^\top \right\|_2 \leq d^{1/2} B_{f-1}^{\prime 3} B_f^{\prime \prime 2} \sum_c \left\| (J_{f-1})_{c:} \right\|_2 \\
&\leq d^{3/2} B_{f-1}^{\prime 4} B_f^{\prime \prime 2}, \tag{33}
\end{aligned}$$

where we have used Eq. (22) in the last inequality. For the third term,

$$\begin{aligned}
&\left\| \sum_{cijk} (J_{f-1})_{ci} (\partial_k \partial_i \partial_j f_c) (J_{f-1})_{:k} (J_{f-1})_{:j}^\top \right\|_2 \\
&\leq \sum_{cijk} \left| (J_{f-1})_{ci} (\partial_k \partial_i \partial_j f_c) \right| \left\| (J_{f-1})_{:k} (J_{f-1})_{:j}^\top \right\|_2 \leq B_f^{\prime \prime \prime} \sum_{ci} \left| (J_{f-1})_{ci} \right| \sum_{jk} \left\| (J_{f-1})_{:k} (J_{f-1})_{:j}^\top \right\|_2 \\
&\leq d^{3/2} B_f^{\prime \prime \prime} \left\| J_{f-1} \right\|_2 \sum_{jk} \left| (J_{f-1})_{:k} (J_{f-1})_{:j}^\top \right| \leq d^{3/2} B_f^{\prime \prime \prime} B_{f-1} \sum_{jk} \left| (J_{f-1}^\top J_{f-1})_{kj} \right| \\
&\leq d^3 B_f^{\prime \prime \prime} B_{f-1} \left\| J_{f-1}^\top J_{f-1} \right\|_2 \leq d^3 B_f^{\prime \prime \prime} B_{f-1}^3, \tag{34}
\end{aligned}$$

where we have used Eq. (29) in the fourth last and second last inequalities.

Finally, by assembling Eqs. (30, 31, 32, 33, 34) into Eq. (15), we have:

$$\begin{aligned}
|p(x) - (\bar{p}_z V)(x)| &\leq \frac{1}{2} \mathbb{E}[\mu^\top \mu] B_p B_{f-1}^{\prime d} (B_{f-1}^{\prime 2} B_{\log p}^{\prime 2} + 2d B_{f-1}^{\prime 3} B_f^{\prime \prime} B_{\log p}^{\prime} + d^{3/2} B_{f-1}^{\prime 4} B_f^{\prime \prime 2} \\
&\quad + B_{f-1}^{\prime 2} (B_{\log p}^{\prime \prime} + d B_{f-1}^{\prime} B_f^{\prime \prime} B_{\log p}^{\prime}) + 2d^{3/2} B_{f-1}^{\prime 4} B_f^{\prime \prime 2} + d^3 B_f^{\prime \prime \prime} B_{f-1}^3) \\
&= \frac{1}{2} \mathbb{E}[\mu^\top \mu] B_p B_{f-1}^{\prime d+2} (B_{\log p}^{\prime 2} + B_{\log p}^{\prime \prime} + 3d B_{f-1}^{\prime} B_f^{\prime \prime} B_{\log p}^{\prime} \\
&\quad + 3d^{3/2} B_{f-1}^{\prime 2} B_f^{\prime \prime 2} + d^3 B_f^{\prime \prime \prime} B_{f-1}^3).
\end{aligned}$$

So given the condition (iii), this residual can be neglected.  $\square$

### A.3 Proof of the OOD Generalization Error Bound Thm. 6

We give the following more detailed version of Thm. 6 and prove it. The theorem in the main context corresponds to conclusion (ii) below (i.e., Eq. (38) below recovers Eq. (6)), by taking the CSGs  $p'$ ,  $p$  and  $\tilde{p}$ , as the semantic-identified CSG  $p$  on the training domain, and the ground-truth CSGs  $p^*$  and  $\tilde{p}^*$  on the training and test domains, respectively. In the theorem in the main context, the semantic-identification requirement on the learned CSG  $p$  is to guarantee that it is semantic-equivalent to the ground-truth CSG  $p^*$  on the training domain, so that the condition in conclusion (ii) below is satisfied.

**Theorem 6'** (OOD generalization error). *Let Assumption 3 hold. (i) Consider two CSGs  $p$  and  $\tilde{p}$  that share the same generative mechanisms  $p(x|s, v)$  and  $p(y|s)$  but have different priors  $p_{s,v}$  and  $\tilde{p}_{s,v}$ . Then up to  $O(\sigma_\mu^2)$  where  $\sigma_\mu^2 := \mathbb{E}[\mu^\top \mu]$ , we have for any  $x \in \text{supp}(p_x) \cap \text{supp}(\tilde{p}_x)$ ,*

$$\left| \mathbb{E}[y|x] - \tilde{\mathbb{E}}[y|x] \right| \leq \sigma_\mu^2 \|\nabla g\|_2 \|J_{f^{-1}}\|_2^2 \left\| \nabla \log(p_{s,v}/\tilde{p}_{s,v}) \right\|_2 \Big|_{(s,v)=f^{-1}(x)}, \quad (35)$$

where  $J_{f^{-1}}$  is the Jacobian of  $f^{-1}$ . Further assume that the bounds  $B$ 's defined in Thm. 5'(iii) hold. Then the error is negligible for any  $x \in \text{supp}(p_x) \cap \text{supp}(\tilde{p}_x)$  if  $\frac{1}{\sigma_\mu^2} \gg B'_{\log p} B'_g B'^2_{f^{-1}}$ , and:

$$\begin{aligned} \mathbb{E}_{\tilde{p}(x)} \left| \mathbb{E}[y|x] - \tilde{\mathbb{E}}[y|x] \right|^2 &\leq \sigma_\mu^4 B_g'^2 B_{f^{-1}}'^4 \mathbb{E}_{\tilde{p}_{s,v}} \left\| \nabla \log(p_{s,v}/\tilde{p}_{s,v}) \right\|_2^2 \\ &= \sigma_\mu^4 B_g'^2 B_{f^{-1}}'^4 \mathbb{E}_{\tilde{p}_{s,v}} [2\Delta \log p_{s,v} - \Delta \log \tilde{p}_{s,v} + \|\nabla \log p_{s,v}\|_2^2] \end{aligned} \quad (36)$$

if  $\text{supp}(p_x) = \text{supp}(\tilde{p}_x)$ , where  $\Delta$  denotes the Laplacian operator.

(ii) Let  $p'$  be a CSG that is semantic-equivalent to the CSG  $p$  introduced in (i). Then up to  $O(\sigma_\mu^2)$ , we have for any  $x \in \text{supp}(p'_x) \cap \text{supp}(\tilde{p}_x)$ ,

$$\left| \mathbb{E}'[y|x] - \tilde{\mathbb{E}}[y|x] \right| \leq \sigma_\mu^2 \|\nabla g'\|_2 \|J_{f'^{-1}}\|_2^2 \left\| \nabla \log(p'_{s,v}/\tilde{p}'_{s,v}) \right\|_2 \Big|_{(s,v)=f'^{-1}(x)}, \quad (37)$$

where  $\tilde{p}'_{s,v} := \Phi_\#[\tilde{p}_{s,v}]$  is the prior of CSG  $\tilde{p}$  under the parameterization of CSG  $p'$ , derived as the pushed-forward distribution by the reparameterization  $\Phi := f'^{-1} \circ f$  from  $p$  to  $p'$ . Similarly,

$$\mathbb{E}_{\tilde{p}(x)} \left| \mathbb{E}'[y|x] - \tilde{\mathbb{E}}[y|x] \right|^2 \leq \sigma_\mu^4 B_g'^2 B_{f^{-1}}'^4 \mathbb{E}_{\tilde{p}'_{s,v}} \left\| \nabla \log(p'_{s,v}/\tilde{p}'_{s,v}) \right\|_2^2 \quad (38)$$

$$= \sigma_\mu^4 B_g'^2 B_{f^{-1}}'^4 \mathbb{E}_{\tilde{p}'_{s,v}} [2\Delta \log p'_{s,v} - \Delta \log \tilde{p}'_{s,v} + \|\nabla \log p'_{s,v}\|_2^2]. \quad (39)$$

In the expected OOD generalization error in Eqs. (36, 39), the term  $\mathbb{E}_{\tilde{p}_{s,v}} [2\Delta \log p_{s,v} - \Delta \log \tilde{p}_{s,v} + \|\nabla \log p_{s,v}\|_2^2]$  is actually the score matching objective (Fisher divergence) [47] that measures the difference between  $\tilde{p}_{s,v}$  and  $p_{s,v}$ . For Gaussian priors  $p(s, v) = \mathcal{N}(0, \Sigma)$  and  $\tilde{p}(s, v) = \mathcal{N}(0, \tilde{\Sigma})$ , the term reduces to the matrix trace,  $\text{tr}(-2\Sigma^{-1} + \tilde{\Sigma}^{-1} + \Sigma^{-1}\tilde{\Sigma}\Sigma^{-1})$ . For  $\Sigma = \tilde{\Sigma}$ , the term vanishes.

For conclusion (ii), note that since  $p$  and  $p'$  are semantic-equivalent, we have  $p'_x = p_x$  and  $\mathbb{E}'[y|x] = \mathbb{E}[y|x]$  (from Lemma 9). So Eqs. (35, 37) and Eqs. (36, 39) bound the same quantity. Equation (37) expresses the bound using the structures of the CSG  $p'$ . It is considered since recovering the exact CSG  $p$  from  $(x, y)$  data is impractical and we can only learn a CSG  $p'$  that is semantic-equivalent to  $p$ .

**Proof.** Following the proof A.2 of Thm. 5', we assume the additive noise variables  $\mu$  and  $\nu$  (for continuous  $y$ ) have zero mean without loss of generality, and we denote  $z := (s, v)$ .

**Proof under condition (i).** Under the assumptions, we have Eq. (14) in the proof A.2 of Thm. 5' hold. Noting that the two CSGs share the same  $\bar{g}$  and  $V$  (since they share the same  $p(x|s, v)$  and  $p(y|s)$  thus  $f$  and  $g$ ), we have for any  $x \in \text{supp}(p_x) \cap \text{supp}(\tilde{p}_x)$ ,

$$\begin{aligned} \mathbb{E}[y|x] &= \bar{g} + \frac{1}{2} \mathbb{E}_{p(\mu)} [\mu^\top ((\nabla \log \bar{p}_z V) \nabla \bar{g}^\top + \nabla \bar{g} (\nabla \log \bar{p}_z V)^\top + \nabla \nabla^\top \bar{g}) \mu] + O(\sigma_\mu^3), \\ \tilde{\mathbb{E}}[y|x] &= \bar{g} + \frac{1}{2} \mathbb{E}_{p(\mu)} [\mu^\top ((\nabla \log \tilde{p}_z V) \nabla \bar{g}^\top + \nabla \bar{g} (\nabla \log \tilde{p}_z V)^\top + \nabla \nabla^\top \bar{g}) \mu] + O(\sigma_\mu^3), \end{aligned} \quad (40)$$

where we have similarly defined  $\tilde{p}_z := \tilde{p}_z \circ f^{-1}$ . By subtracting the two equations, we have that up to  $O(\sigma_\mu^2)$ ,

$$\begin{aligned} \left| \mathbb{E}[y|x] - \tilde{\mathbb{E}}[y|x] \right| &= \frac{1}{2} \left| \mathbb{E}_{p(\mu)} \left[ \mu^\top (\nabla \log(\tilde{p}_z/\tilde{p}_z) \nabla \tilde{g}^\top + \nabla \tilde{g} \nabla \log(\tilde{p}_z/\tilde{p}_z)^\top) \mu \right] \right| \\ &\leq \frac{1}{2} \mathbb{E}_{p(\mu)} \left[ \left| \mu^\top (\nabla \log(\tilde{p}_z/\tilde{p}_z) \nabla \tilde{g}^\top + \nabla \tilde{g} \nabla \log(\tilde{p}_z/\tilde{p}_z)^\top) \mu \right| \right] \\ &\leq \frac{1}{2} \mathbb{E}_{p(\mu)} \left[ \|\mu\|_2^2 (\|\nabla \log(\tilde{p}_z/\tilde{p}_z) \nabla \tilde{g}^\top\|_2 + \|\nabla \tilde{g} \nabla \log(\tilde{p}_z/\tilde{p}_z)^\top\|_2) \right] \\ &= |\nabla \tilde{g}^\top \nabla \log(\tilde{p}_z/\tilde{p}_z)| \mathbb{E}[\mu^\top \mu]. \end{aligned} \quad (41)$$

The multiplicative factor to  $\mathbb{E}[\mu^\top \mu]$  on the right hand side can be further bounded by:

$$\begin{aligned} |\nabla \tilde{g}^\top \nabla \log(\tilde{p}_z/\tilde{p}_z)| &= |(J_{(f^{-1})^S} \nabla g)^\top (J_{f^{-1}} \nabla \log(p_z/\tilde{p}_z))| \\ &= \left| \nabla g^\top J_{(f^{-1})^S}^\top J_{f^{-1}} \nabla \log(p_z/\tilde{p}_z) \right| \\ &= \left| ((\nabla g)^\top, 0_{d_v}^\top) J_{f^{-1}}^\top J_{f^{-1}} \nabla \log(p_z/\tilde{p}_z) \right| \\ &\leq \|\nabla g\|_2 \|J_{f^{-1}}\|_2^2 \|\nabla \log(p_z/\tilde{p}_z)\|_2, \end{aligned} \quad (42)$$

where  $\nabla g$  and  $\nabla \log(p_z/\tilde{p}_z)$  are evaluated at  $z = f^{-1}(x)$ . This gives:

$$\left| \mathbb{E}[y|x] - \tilde{\mathbb{E}}[y|x] \right| \leq \sigma_\mu^2 \|\nabla g\|_2 \|J_{f^{-1}}\|_2^2 \|\nabla \log(p_z/\tilde{p}_z)\|_2,$$

*i.e.* Eq. (35) in conclusion (i). When the bounds  $B$ 's in Thm. 5' (iii) hold, we further have:

$$\begin{aligned} \left| \mathbb{E}[y|x] - \tilde{\mathbb{E}}[y|x] \right| &\leq \sigma_\mu^2 \|\nabla g\|_2 \|J_{f^{-1}}\|_2^2 \|\nabla \log p_z - \nabla \log \tilde{p}_z\|_2 \\ &\leq \sigma_\mu^2 \|\nabla g\|_2 \|J_{f^{-1}}\|_2^2 (\|\nabla \log p_z\|_2 + \|\nabla \log \tilde{p}_z\|_2) \\ &\leq 2\sigma_\mu^2 B'_g B_{f^{-1}}'^2 B'_{\log p}. \end{aligned}$$

So when  $\frac{1}{\sigma_\mu^2} \gg B'_{\log p} B'_g B_{f^{-1}}'^2$ , this difference is negligible for any  $x \in \text{supp}(p_x) \cap \text{supp}(\tilde{p}_x)$ .

We now turn to the expected OOD generalization error Eq. (36) in conclusion (i). When  $\text{supp}(p_x) = \text{supp}(\tilde{p}_x)$ , Eq. (35) hold on  $\tilde{p}_x$ . Together with the bounds in Thm. 5' (iii), we have:

$$\begin{aligned} \mathbb{E}_{\tilde{p}(x)} \left| \mathbb{E}[y|x] - \tilde{\mathbb{E}}[y|x] \right|^2 &\leq \sigma_\mu^4 B_g'^2 B_{f^{-1}}'^4 \mathbb{E}_{\tilde{p}(x)} \left\| \nabla \log(p_z/\tilde{p}_z) \Big|_{z=f^{-1}(x)} \right\|_2^2 \\ &= \sigma_\mu^4 B_g'^2 B_{f^{-1}}'^4 \mathbb{E}_{\tilde{p}_z} \|\nabla \log(p_z/\tilde{p}_z)\|_2^2, \end{aligned}$$

where the equality holds due to the generating process of the model. Note that the term  $\mathbb{E}_{\tilde{p}_z} \|\nabla \log(p_z/\tilde{p}_z)\|_2^2$  therein is the score matching objective (Fisher divergence). By Hyvärinen [47, Thm. 1], we can reformulate it as  $\mathbb{E}_{\tilde{p}_z} [2\Delta \log p_z - \Delta \log \tilde{p}_z + \|\nabla \log p_z\|_2^2]$ , so we have:

$$\mathbb{E}_{\tilde{p}(x)} \left| \mathbb{E}[y|x] - \tilde{\mathbb{E}}[y|x] \right|^2 \leq \sigma_\mu^4 B_g'^2 B_{f^{-1}}'^4 \mathbb{E}_{\tilde{p}_z} [2\Delta \log p_z - \Delta \log \tilde{p}_z + \|\nabla \log p_z\|_2^2].$$

**Proof under condition (ii).** From Eq. (14) in the proof A.2 of Thm. 5', we have for CSG  $p'$  that for any  $x \in \text{supp}(p'_x)$  or equivalently  $x \in \text{supp}(p_x)$ ,

$$\mathbb{E}'[y|x] = \tilde{g}' + \frac{1}{2} \mathbb{E}_{p(\mu)} \left[ \mu^\top ((\nabla \log \tilde{p}'_z V') \nabla \tilde{g}'^\top + \nabla \tilde{g}' (\nabla \log \tilde{p}'_z V')^\top + \nabla \nabla^\top \tilde{g}') \mu \right] + O(\sigma_\mu^3), \quad (43)$$

where we have similarly defined  $\tilde{p}'_z := p'_z \circ f'^{-1}$  and  $\tilde{g}' := g' \circ (f'^{-1})^S$ . Since  $p$  and  $p'$  are semantic-equivalent with reparameterization  $\Phi$  from  $p$  to  $p'$ , we have  $p(y|s) = p'(y|\Phi^S(s, v))$  thus  $g(s) = g'(\Phi^S(s, v))$  for any  $v \in \mathcal{V}$ . So for any  $x \in \text{supp}(p_x)$  or equivalently  $x \in \text{supp}(p'_x)$ , we have  $g((f^{-1})^S(x)) = g'(\Phi^S((f^{-1})^S(x), (f^{-1})^V(x))) = g'(\Phi^S(f^{-1}(x))) = g'((f'^{-1})^S(f(f^{-1}(x)))) = g'((f'^{-1})^S(x))$ , *i.e.*,  $\tilde{g} = \tilde{g}'$ . For another fact, since  $\tilde{p}'_z := \Phi_\#[\tilde{p}_z] = (f'^{-1} \circ f)_\#[\tilde{p}_z]$  by definition, we have  $f'_\#[\tilde{p}'_z] = f_\#[\tilde{p}_z]$ , *i.e.*,  $\tilde{p}'_z V' = \tilde{p}_z V$ . Subtracting Eqs. (43, 40) and applying these two facts, we have up to  $O(\sigma_\mu^2)$ , for any  $x \in \text{supp}(p'_x) \cap \text{supp}(\tilde{p}_x)$ ,

$$\left| \mathbb{E}'[y|x] - \tilde{\mathbb{E}}[y|x] \right| = \frac{1}{2} \left| \mathbb{E}_{p(\mu)} \left[ \mu^\top (\nabla \log(\tilde{p}'_z/\tilde{p}'_z) \nabla \tilde{g}'^\top + \nabla \tilde{g}' \nabla \log(\tilde{p}'_z/\tilde{p}'_z)^\top) \mu \right] \right|$$

$$\leq \left| \nabla \bar{g}'^\top \nabla \log(\bar{p}'_z / \bar{p}_z) \right| \mathbb{E}[\mu^\top \mu],$$

where the inequality follows Eq. (41). Using a similar result of Eq. (42), we have:

$$\left| \mathbb{E}'[y|x] - \tilde{\mathbb{E}}[y|x] \right| \leq \sigma_\mu^2 \|\nabla g'\|_2 \|J_{f'^{-1}}\|_2^2 \|\nabla \log(p'_z / \bar{p}'_z)\|_2,$$

where  $\nabla g'$  and  $\nabla \log(p'_z / \bar{p}'_z)$  are evaluated at  $z = f'^{-1}(x)$ . This gives Eq. (37). Derivation of Eqs. (38, 39) is similar as in conclusion (i).  $\square$

#### A.4 Proof of the Domain Adaptation Error Thm. 7

To be consistent with the notation in the proofs, we prove the theorem by denoting the semantic-identified CSG  $p$  and the ground-truth CSG  $\bar{p}^*$  on the test domain as  $p'$  and  $\bar{p}$ , respectively.

**Proof.** The new prior  $\bar{p}'(z)$  is learned by fitting unsupervised data from the test domain  $\tilde{p}(x)$ . Applying the deduction in the proof A.2 of Thm. 5' to the test domain, we have that under any of the three conditions in Thm. 5',  $\tilde{p}(x) = \bar{p}'(x)$  indicates  $f_\#[\tilde{p}_z] = f'_\#[\bar{p}'_z]$ . This gives  $\bar{p}'_z = (f'^{-1} \circ f)_\#[\tilde{p}_z] = \Phi_\#[\tilde{p}_z]$ .

From Eq. (12) in the same proof, we have that:

$$\begin{aligned} \tilde{p}(x) \tilde{\mathbb{E}}[y|x] &= (f_\#[g\tilde{p}_z] * p_\mu)(x) = ((f_\#[\tilde{p}_z]\bar{g}) * p_\mu)(x), \\ \bar{p}'(x) \tilde{\mathbb{E}}'[y|x] &= (f'_\#[g'\bar{p}'_z] * p_\mu)(x) = ((f'_\#[\bar{p}'_z]\bar{g}') * p_\mu)(x). \end{aligned}$$

From the proof A.3 of Thm. 6'(ii) (the paragraph under Eq. (43)), the semantic-equivalence between CSGs  $p$  and  $p'$  indicates that  $\bar{g} = \bar{g}'$ . So from the above two equations, we have  $\tilde{p}(x) \tilde{\mathbb{E}}[y|x] = \bar{p}'(x) \tilde{\mathbb{E}}'[y|x]$  (recall that  $\tilde{p}(x) = \bar{p}'(x)$  indicates  $f_\#[\tilde{p}_z] = f'_\#[\bar{p}'_z]$ ). Since  $\tilde{p}(x) = \bar{p}'(x)$  (that is how  $\bar{p}'_z$  is learned), we have for any  $x \in \text{supp}(\tilde{p}_x)$  or equivalently  $x \in \text{supp}(\bar{p}'_x)$ ,

$$\tilde{\mathbb{E}}'[y|x] = \tilde{\mathbb{E}}[y|x]. \quad (44)$$

$\square$

## B Alternative Identifiability Theory for CSG

The presented identifiability theory, particularly Thm. 5, shows that the semantic-identifiability can be achieved in the deterministic limit ( $\frac{1}{\sigma_\mu^2} \rightarrow \infty$ ), but does not quantitatively describe the extent of violation of the identifiability for a finite variance  $\sigma_\mu^2$ . Here we define a ‘‘soft’’ version of semantic-equivalence and show that it can be achieved with a finite variance, with a trade-off between the ‘‘softness’’ and the variance.

**Definition 15** ( $\delta$ -semantic-dependency). For  $\delta > 0$  and two CSGs  $p$  and  $p'$ , we say that they are  $\delta$ -semantic-dependent, if there exists a homeomorphism  $\Phi$  on  $\mathcal{S} \times \mathcal{V}$  such that: (i)  $p(x|s, v) = p'(x|\Phi(s, v))$ , (ii)  $\sup_{v \in \mathcal{V}} \|g(s) - g'(\Phi^S(s, v))\|_2 \leq \delta$  where we have denoted  $g(s) := \mathbb{E}[y|s]$ , and (iii)  $\sup_{v^{(1)}, v^{(2)} \in \mathcal{V}} \|\Phi^S(s, v^{(1)}) - \Phi^S(s, v^{(2)})\|_2 \leq \delta$ .

In the definition, we have released the prior conversion requirement, and relaxed the exact likelihood conversion for  $p(y|s)$  in (ii) and the  $v$ -constancy of  $\Phi^S$  in (iii) to allow an error bounded by  $\delta$ . When  $\delta = 0$ , the  $v$ -constancy of  $\Phi^S$  is exact, and under the additive noise Assumption 3 we also have the exact likelihood conversion  $p(y|s) = p'(y|\Phi^S(s, v))$  for any  $v \in \mathcal{V}$ . So 0-semantic-dependency with the prior conversion requirement reduces to the semantic-equivalence.

Due to the quantitative nature, the binary relation cannot be made an equivalence relation but only a dependency. Here, a dependency refers to a binary relation with reflexivity and symmetry, but no transitivity.

**Proposition 16.** *The  $\delta$ -semantic-dependency is a dependency relation if the function  $g := \mathbb{E}[y|s]$  is bijective and its inverse  $g^{-1}$  is  $\frac{1}{2}$ -Lipschitz.*

**Proof.** Showing a dependency relation amounts to showing the following two properties.

- **Reflexivity.** For two identical CSGs  $p$  and  $p'$ , we have  $p(x|s, v) = p'(x|s, v)$  and  $p(y|s) = p'(y|s)$ . So the identity map as  $\Phi$  obviously satisfies all the requirements in Def. 15.

- **Symmetry.** Let CSG  $p$  be  $\delta$ -semantic-dependent to CSG  $p'$  with homeomorphism  $\Phi$ . Obviously  $\Phi^{-1}$  is also a homeomorphism. For any  $(s', v') \in \mathcal{S} \times \mathcal{V}$ , we have  $p'(x|s', v') = p'(x|\Phi(\Phi^{-1}(s', v'))) = p(x|\Phi^{-1}(s', v'))$ , and  $\|g'(s') - g((\Phi^{-1})^{\mathcal{S}}(s', v'))\|_2 = \|g'(\Phi^{\mathcal{S}}(s, v)) - g(s)\|_2 \leq \delta$  where we have denoted  $(s, v) := \Phi^{-1}(s', v')$  here. So  $\Phi^{-1}$  satisfies requirements **(i)** and **(ii)** in Def. 15.

For requirement **(iii)**, we need the following fact: for any  $s^{(1)}, s^{(2)} \in \mathcal{S}$ ,  $\|s^{(1)} - s^{(2)}\|_2 = \|g^{-1}(g(s^{(1)})) - g^{-1}(g(s^{(2)}))\|_2 \leq \frac{1}{2}\|g(s^{(1)}) - g(s^{(2)})\|_2$ , where the inequality holds since  $g^{-1}$  is  $\frac{1}{2}$ -Lipschitz. Then for any  $s' \in \mathcal{S}$ , we have:

$$\begin{aligned}
& \sup_{v^{(1)}, v^{(2)} \in \mathcal{V}} \left\| (\Phi^{-1})^{\mathcal{S}}(s', v^{(1)}) - (\Phi^{-1})^{\mathcal{S}}(s', v^{(2)}) \right\|_2 \\
& \leq \sup_{v^{(1)}, v^{(2)} \in \mathcal{V}} \frac{1}{2} \left\| g((\Phi^{-1})^{\mathcal{S}}(s', v^{(1)})) - g((\Phi^{-1})^{\mathcal{S}}(s', v^{(2)})) \right\|_2 \\
& = \sup_{v^{(1)}, v^{(2)} \in \mathcal{V}} \frac{1}{2} \left\| \left( g((\Phi^{-1})^{\mathcal{S}}(s', v^{(1)})) - g'(s') \right) - \left( g((\Phi^{-1})^{\mathcal{S}}(s', v^{(2)})) - g'(s') \right) \right\|_2 \\
& \leq \sup_{v^{(1)}, v^{(2)} \in \mathcal{V}} \frac{1}{2} \left( \left\| g((\Phi^{-1})^{\mathcal{S}}(s', v^{(1)})) - g'(s') \right\|_2 + \left\| g((\Phi^{-1})^{\mathcal{S}}(s', v^{(2)})) - g'(s') \right\|_2 \right) \\
& = \frac{1}{2} \left( \sup_{v^{(1)} \in \mathcal{V}} \left\| g((\Phi^{-1})^{\mathcal{S}}(s', v^{(1)})) - g'(s') \right\|_2 + \sup_{v^{(2)} \in \mathcal{V}} \left\| g((\Phi^{-1})^{\mathcal{S}}(s', v^{(2)})) - g'(s') \right\|_2 \right) \\
& \leq \delta,
\end{aligned}$$

where in the last inequality we have used the fact that  $\Phi^{-1}$  satisfies requirement **(ii)**. So  $p'$  is  $\delta$ -semantic-dependent to  $p$  via the homeomorphism  $\Phi^{-1}$ .  $\square$

The corresponding  $\delta$ -semantic-identifiability result follows.

**Theorem 17** ( $\delta$ -semantic-identifiability). *Assume the same as Thm. 5' and Prop. 16, and let the bounds  $B$ 's defined in Thm. 5' **(iii)** hold. For two such CSGs  $p$  and  $p'$ , if they have  $p(x, y) = p'(x, y)$ , then they are  $\delta$ -semantic-dependent for any  $\delta \geq \sigma_\mu^2 B_{f^{-1}}'^2 (2B_{\log p}' B_g' + B_g'' + 3dB_{f^{-1}}' B_f'' B_g')$ , where  $d := d_{\mathcal{S}} + d_{\mathcal{V}}$ .*

**Proof.** Let  $\Phi := f'^{-1} \circ f$ , where  $f$  and  $f'$  are given by the two CSGs  $p$  and  $p'$  via the additive noise Assumption 3. We now show that  $p$  and  $p'$  are  $\delta$ -semantic-dependent via this  $\Phi$  for any  $\delta$  in the theorem. Obviously  $\Phi$  is a homeomorphism on  $\mathcal{S} \times \mathcal{V}$ , and it satisfies requirement **(i)** in Def. 15 by construction due to Eq. (7) in the proof A.2 of Thm. 5'.

Consider requirement **(ii)** in Def. 15. Based on the same assumptions as Thm. 5', we have Eq. (25) hold for both CSGs:

$$\max\{\|\mathbb{E}[y|x] - \bar{g}(x)\|_2, \|\mathbb{E}'[y|x] - \bar{g}'(x)\|_2\} \leq \sigma_\mu^2 B_{f^{-1}}'^2 (B_{\log p}' B_g' + \frac{1}{2} B_g'' + \frac{3}{2} dB_{f^{-1}}' B_f'' B_g'),$$

where we have denoted  $\sigma_\mu^2 := \mathbb{E}[\mu^\top \mu]$ . Since both CSGs induce the same  $p(y|x)$ , so  $\mathbb{E}[y|x] = \mathbb{E}'[y|x]$ . This gives:

$$\begin{aligned}
& \|\bar{g}(x) - \bar{g}'(x)\|_2 = \|(\mathbb{E}'[y|x] - \bar{g}'(x)) - (\mathbb{E}[y|x] - \bar{g}(x))\|_2 \\
& \leq \|\mathbb{E}'[y|x] - \bar{g}'(x)\|_2 + \|\mathbb{E}[y|x] - \bar{g}(x)\|_2 \\
& \leq \sigma_\mu^2 B_{f^{-1}}'^2 (2B_{\log p}' B_g' + B_g'' + 3dB_{f^{-1}}' B_f'' B_g').
\end{aligned}$$

So for any  $(s, v) \in \mathcal{S} \times \mathcal{V}$ , by denoting  $x := f(s, v)$ , we have:

$$\begin{aligned}
& \|g(s) - g'(\Phi^{\mathcal{S}}(s, v))\|_2 = \|g((f^{-1})^{\mathcal{S}}(x)) - g'((f'^{-1})^{\mathcal{S}}(f(s, v)))\|_2 = \|\bar{g}(x) - \bar{g}'(x)\|_2 \\
& \leq \sigma_\mu^2 B_{f^{-1}}'^2 (2B_{\log p}' B_g' + B_g'' + 3dB_{f^{-1}}' B_f'' B_g').
\end{aligned}$$

So the requirement is satisfied.

For requirement **(iii)**, note from the proof of Prop. 16 that when  $g$  is bijective and its inverse is  $\frac{1}{2}$ -Lipschitz, requirement **(ii)** implies requirement **(iii)**. So this  $\Phi$  is a homeomorphism that makes  $p$   $\delta$ -semantic-dependent to  $p'$  for any  $\delta \geq \sigma_\mu^2 B_{f^{-1}}'^2 (2B_{\log p}' B_g' + B_g'' + 3dB_{f^{-1}}' B_f'' B_g')$ .  $\square$

Note that although the  $\delta$ -semantic-dependency does not have transitivity, the above theorem is still informative: for any two CSGs sharing the same data distribution, particularly for a well-learned CSG  $p$  and the ground-truth CSG  $p^*$ , the likelihood conversion error  $\sup_{(s,v) \in \mathcal{S} \times \mathcal{V}} \|g(s) - g'(\Phi^{\mathcal{S}}(s, v))\|_2$ , and the degree of mixing  $v$  into  $s$ , measured by  $\sup_{v^{(1)}, v^{(2)} \in \mathcal{V}} \|\Phi^{\mathcal{S}}(s, v^{(1)}) - \Phi^{\mathcal{S}}(s, v^{(2)})\|_2$ , are bounded by  $\sigma_{\mu}^2 B_{f-1}'^2 (2B_{\log p}' B_g' + B_g'' + 3dB_{f-1}' B_f'' B_g')$ .

## C More Explanations on the Model

**Explanations on our model.** We see the data generating process as coming up with a conceptual latent factors  $(s, v)$  first, and then generating both  $x$  and  $y$  based on the factors. A prototyping example is that a photographer takes an image  $x$  of an object and meanwhile gives a label  $y$  to it, based on conceptual features  $(s, v)$  in the scene (*e.g.*, shape, color, texture, orientation and pose of the object, background objects and environment, illumination during imaging). The image  $x$  is produced by assembling these factors  $(s, v)$  in the scene and passing the reflected light through a camera, and the label  $y$  is produced by processing causally relevant factors  $s$  (*e.g.*, object shape, texture) by the photographer. Under this view, intervening the image  $x$  is to break the imaging process (*e.g.*, by malfunctioning the camera by breaking a sensor unit or making the sensor noisy), which does not alter the latent factors  $(s, v)$  and the labeling process, hence also the label  $y$ . Similarly, intervening the label  $y$  is to break the labeling process (*e.g.*, by reforming the labeling rule or randomly flipping the labels), which does not alter the latent factors  $(s, v)$  and the imaging process, hence also the image  $x$ . On the other hand, intervening the latent factors  $(s, v)$  (*e.g.*, by replacing the object with a different one at the imaging and labeling moment) may change both  $x$  and  $y$  through the imaging and labeling processes. This verifies the model in Fig. 1a by checking its causal implications.

This view of the data generating process is also adopted and promoted by popular existing works. McAuliffe and Blei [78] treat both a document and its label be generated by the involved topics in the document (represented as a topic proportion), which is an abstract latent factor. Peters et al. [88, Sec. 1.4]; Kilbertus et al. [59] view the generation of an OCR dataset under a causal perspective as the writer first comes up with an intension to write a character, and then writes down the character and gives its label based on the intension. Teshima et al. [108] treat both an image and its label be produced from a set of latent factors. This view of the data generating process is also natural for medical image datasets, where the label may be diagnosed based on more fundamental features (*e.g.*, PCR test results showing the pathogen) that are not included in the dataset but actually cause the medical image.

On the labeling process from images that one would commonly think of, we also view it as a  $s \rightarrow y$  process. Human directly knows the critical semantic feature  $s$  (*e.g.*, the shape and position of each stroke) by seeing the image, through the nature gift of the vision system [12]. The label is given by processing the feature (*e.g.*, the angle between two linear strokes, the position of a circular stroke relative to a linear stroke), which is a  $s \rightarrow y$  process.

The causal graph in Fig. 1a implies that  $x \perp\!\!\!\perp y \mid s$ . However, this does not indicate that the semantic factor  $s$  generates an image  $x$  regardless of the label  $y$ . Given  $s$ , the generated image is dictated to hold the given semantics regardless of randomness, so the statistical independence does not mean semantic irrelevance. If an image  $x$  is given, the corresponding label is given by  $p(y|x)$ , which is  $\int p(s|x)p(y|s) ds$  by the causal graph. So the semantic concept to cause the label through  $p(y|s)$ , is inferred from the image through  $p(s|x)$ .

**Comparison with the graph**  $y_{tx} \rightarrow s \rightarrow x \rightarrow y_{rx}$ . One may consider this graph as a communication channel, where  $y_{tx}$  is a transmitted signal and  $y_{rx}$  is the received signal.

If the observed label  $y$  is treated as  $y_{tx}$ , the graph then implies  $y \rightarrow s$ . This is argued at the end of item (2) in Sec. 3 that it may make unreasonable implications. Moreover, the graph also implies that  $y$  is a cause of  $x$ , as is challenged in item (1) in Sec. 3. The unnatural implications arise since intervening  $y$  is different from intervening the “ground-truth” label. We consider  $y$  as an observation that may be noisy, while the “ground-truth label” is never observed: one cannot tell if the labels at hand are noise-corrupted, based on the dataset alone. For example, the label of either image in Fig. 2 may be given by a labeler’s random guess. Our adopted causal direction  $s \rightarrow y$  is consistent with these examples and is also argued and adopted by McAuliffe and Blei [78]; Peters et al. [88, Sec. 1.4]; Kilbertus et al. [59]; Teshima et al. [108].

If the observed label  $y$  is treated as  $y_{rx}$ , the graph then implies  $x \rightarrow y$ , as is challenged in item **(1)** in Sec. 3. It is also argued by Schölkopf et al. [97]; Peters et al. [88, Sec. 1.4]; Kilbertus et al. [59]. Treating the observed label  $y$  as  $y_{rx}$  and  $y_{tx}$  as the “ground-truth” label may be the motivation of this graph. But the graph implies  $y_{tx} \perp\!\!\!\perp y_{rx} \mid x$ , that is,  $p(y_{tx}|x, y_{rx}) = p(y_{tx}|x)$  and  $p(y_{rx}|x, y_{tx}) = p(y_{rx}|x)$ . So modeling  $y_{tx}$  (resp.  $y_{rx}$ ) does not benefit predicting  $y_{rx}$  (resp.  $y_{tx}$ ) from  $x$ .

## D More Related Work

**Generative supervised learning** is not new [78, 63], but most works do not consider the encoded causality. Other works consider solving causality tasks, notably causal/treatment effect estimation [76, 118, 114]. The task does not focus on OOD prediction, and requires labels for both treated and controlled groups.

**Causality with latent variable** has been considered in a rich literature [111, 105, 92, 45, 103], while most works focus on the consequence on observation-level causality. Others consider identifying the latent variable. Janzing et al. [51], Lee et al. [68] show the identifiability under additive noise or similar assumptions. For discrete data, a “simple” latent variable can be identified under various specifications [52, 99, 64]. Romeijn and Williamson [94] consider using interventional datasets for identification. Over these works, we step further to separate and identify the latent variable as semantic and variation factors, and show the benefit for OOD prediction.

## E Relation to Existing Domain Adaptation Theory

In this section, to align with the domain adaptation (DA) literature, we call “training/test domain” as “source/target domain”, and use  $p(x, y)$  and  $\tilde{p}(x, y)$  to denote the underlying data-generating distributions  $p^*(x, y)$  and  $\tilde{p}^*(x, y)$  on the source and target domains, respectively. In a DA task, supervised data from  $p(x, y)$  on the source domain are available, but on the target domain, only unsupervised data from  $\tilde{p}(x) = \int \tilde{p}(x, y) dy$ <sup>15</sup> are available. The goal is to find a labeling function  $h : \mathcal{X} \rightarrow \mathcal{Y}$  within a hypothesis space  $\mathcal{H}$  that minimizes the target-domain risk  $\tilde{R}(h) := \mathbb{E}_{\tilde{p}(x, y)}[\ell(h(x), y)]$  defined by a loss function  $\ell : \mathcal{Y} \times \mathcal{Y} \rightarrow \mathbb{R}$ .

**General DA theory** Since  $\tilde{p}(x, y)$  is not accessible, it is of practical interest to consider the source-domain risk  $R(h)$  and investigate its relation to  $\tilde{R}(h)$ . Ben-David et al. [7, Thm. 1] give a bound relating the two risks:

$$\begin{aligned} \tilde{R}(h) &\leq R(h) + 2d_1(p_x, \tilde{p}_x) \\ &\quad + \min\{\mathbb{E}_{p(x)}[|h^*(x) - \tilde{h}^*(x)|], \mathbb{E}_{\tilde{p}(x)}[|h^*(x) - \tilde{h}^*(x)|]\}, \end{aligned} \quad (45)$$

where:  $d_1(p_x, \tilde{p}_x) := \sup_{X \in \mathcal{X}} |p_x[X] - \tilde{p}_x[X]|$

is the *total variation* between the two distributions,  $\mathcal{X}$  denotes the sigma-field on  $\mathcal{X}$ , and  $h^* \in \operatorname{argmin}_{h \in \mathcal{H}} R(h)$  and  $\tilde{h}^* \in \operatorname{argmin}_{\tilde{h} \in \mathcal{H}} \tilde{R}(\tilde{h})$  are the oracle labeling functions on the source and target domains, respectively (e.g.,  $h^*(x) = \mathbb{E}[y|x]$  and  $\tilde{h}^*(x) = \tilde{\mathbb{E}}[y|x]$  if  $\operatorname{supp}(p_x) = \operatorname{supp}(\tilde{p}_x)$ ). Note that as oracle labeling functions,  $h^*$  and  $\tilde{h}^*$  are two *certain* but not *any* risk minimizers. The second and third terms on the r.h.s measure the domain difference in terms of the distribution on  $x$  and the correspondence of  $y$  on  $x$ , respectively. Zhao et al. [125, Thm. 4.1] give a similar bound in the case of binary classification  $\mathcal{Y} = \{0, 1\}$ , in terms of the  $\mathcal{H}$ -divergence  $d_{\tilde{\mathcal{H}}}$  in place of the total variance  $d_1$ , which is defined as  $d_{\tilde{\mathcal{H}}}(p_x, \tilde{p}_x) := \sup_{X \in \mathcal{X}_{\tilde{\mathcal{H}}}} |p_x[X] - \tilde{p}_x[X]|$ , where  $\mathcal{X}_{\tilde{\mathcal{H}}} := \{h^{-1}(1) : h \in \tilde{\mathcal{H}}\}$  and  $\tilde{\mathcal{H}} := \{\operatorname{sign}(|h(x) - h'(x)| - t) : h, h' \in \mathcal{H}, t \in [0, 1]\}$ .

Ben-David et al. [7] also argue that in this bound, the total variation  $d_1$  is overly strict (thus making the bound unnecessarily loose) and hard to estimate from finite data samples, so they develop another bound which is better known (7, Thm. 2; 54, Thm. 1) (only showing the asymptotic version here, i.e., omitting the estimation error from finite samples):

$$\tilde{R}(h) \leq R(h) + d_{\mathcal{H}\Delta\mathcal{H}}(p_x, \tilde{p}_x) + \lambda_{\mathcal{H}}, \quad (46)$$

<sup>15</sup>Under the general definition of an integral (e.g., Billingsley [13, p.211]), it also allows a discrete  $\mathcal{Y}$ , in which case  $dy$  is the counting measure and the integral reduces to a summation.

$$\text{where: } d_{\mathcal{H}\Delta\mathcal{H}}(p_x, \tilde{p}_x) := \sup_{h, h' \in \mathcal{H}} |\mathbb{E}_{p(x)}[\ell(h(x), h'(x))] - \mathbb{E}_{\tilde{p}(x)}[\ell(h(x), h'(x))]|,$$

$$\lambda_{\mathcal{H}} := \inf_{h \in \mathcal{H}} [R(h) + \tilde{R}(h)].$$

Here,  $d_{\mathcal{H}\Delta\mathcal{H}}(p_x, \tilde{p}_x)$  is called the  $\mathcal{H}\Delta\mathcal{H}$ -divergence measuring the difference between  $p(x)$  and  $\tilde{p}(x)$ , under the discriminative efficacy of the labeling function family  $\mathcal{H}$  (thus not as strict as the total variation  $d_1$ ), and  $\lambda_{\mathcal{H}}$  is the *ideal joint risk* achieved by  $\mathcal{H}$  measuring the richness or expressiveness of  $\mathcal{H}$  for the two prediction tasks. The  $\mathcal{H}\Delta\mathcal{H}$ -divergence  $d_{\mathcal{H}\Delta\mathcal{H}}$  is also estimable from finite data samples [7, Lemma 1]. Long et al. [73, Thm. 1] give a similar bound in terms of maximum mean discrepancy (MMD)  $d_K$  in place of  $d_{\mathcal{H}\Delta\mathcal{H}}$ .

For successful adaptation, some assumptions on the unknown distribution  $\tilde{p}(x, y)$  are required. A commonly adopted one is:

$$(\text{covariate shift}) \tilde{h}^*(x) = h^*(x) \text{ or } p(y|x) = \tilde{p}(y|x), \forall x \in \text{supp}(p_x, \tilde{p}_x) := \text{supp}(p_x) \cup \text{supp}(\tilde{p}_x).$$

**DA-DIR** Domain-invariant representation (DIR) based DA methods (DA-DIR) [83, 5, 73, 33] aims to learn a deterministic representation extractor  $\eta : \mathcal{X} \rightarrow \mathcal{S}$  to some representation space  $\mathcal{S}$ , in order to achieve a domain-invariant representation:

$$(\text{DIR}) p(s) = \tilde{p}(s), \text{ where } p(s) := \eta_{\#}[p_x](s) \text{ and } \tilde{p}(s) := \eta_{\#}[\tilde{p}_x](s)$$

are the representation distributions on the two domains. The motivation is that, once DIR is achieved, the distribution difference term (the second term on the r.h.s) of bound Eq. (45) or Eq. (46) diminishes on the representation space  $\mathcal{S}$ . So the bound on  $\mathcal{S}$  is then controlled by the source risk (the first term), and driving  $h$  to let  $R(h)$  approach  $R(h^*)$  (i.e., to minimize the source risk  $R(h)$ ) effectively minimizes the target risk.

Let  $g : \mathcal{S} \rightarrow \mathcal{Y}$  be a labeling function on the representation space  $\mathcal{S}$ . The end-to-end labeling function is then  $h = g \circ \eta$ . Combining the two desiderata of achieving DIR and  $R(h^*)$ , the typical objective of DA-DIR is in the following form:

$$\min_{\eta \in \mathcal{E}, g \in \mathcal{G}} R(g \circ \eta) + \lambda d(\eta_{\#}[p_x], \eta_{\#}[\tilde{p}_x]),$$

where  $d(\cdot, \cdot)$  is a metric or discrepancy ( $d(q, p) \geq 0$ ;  $d(q, p) = 0 \iff q = p$ ) on distributions,  $\lambda$  is a weighting parameter, and  $\mathcal{E}$  and  $\mathcal{G}$  are the hypothesis spaces for  $\eta$  and  $g$ , respectively.

For the existence of the solution of this problem, Johansson et al. [54] consider the following assumption:

$$(\text{strong existence assumption}) \exists \eta^* \in \mathcal{E}, g^* \in \mathcal{G}, \text{ s.t. } \eta_{\#}^*[p_x] = \eta_{\#}^*[\tilde{p}_x], g^* \circ \eta^* = h^*.$$

They also mention that this is not guaranteed to hold in practice, since it is quite strong: both DIR and  $R(h^*)$  can be simultaneously achieved.

**Problem of DA-DIR** Johansson et al. [54], Zhao et al. [125] give examples where even under the strong assumption of both covariate shift and the strong existence assumption [54, Assumption 3], simultaneously achieving both DIR and  $R(h^*)$  still leads the target risk  $\tilde{R}(g \circ \eta)$  to the worst value.

We first analyze the problem through the lens of the above DA bounds. We will show that when reducing the bounds on  $\mathcal{S}$ , they can be uselessly large.

(1) For the bound Eq. (45). Applying the bound on the representation space  $\mathcal{S}$  gives:

$$\begin{aligned} \tilde{R}(g \circ \eta) &\leq R(g \circ \eta) + 2d_1(\eta_{\#}[p_x], \eta_{\#}[\tilde{p}_x]) \\ &\quad + \min\{\mathbb{E}_{\eta_{\#}[p_x](s)}[|g_{\eta}^*(s) - \tilde{g}_{\eta}^*(s)|], \mathbb{E}_{\eta_{\#}[\tilde{p}_x](s)}[|g_{\eta}^*(s) - \tilde{g}_{\eta}^*(s)|]\}, \end{aligned} \quad (47)$$

where  $g_{\eta}^*$  and  $\tilde{g}_{\eta}^*$  are the optimal labeling functions on top of the representation extractor  $\eta$ . It is shown that under the assumption of covariate shift [8, 35] or additionally strong existence [54], simultaneously achieving both DIR and  $R(h^*)$  is not sufficient to guarantee  $g_{\eta}^* = \tilde{g}_{\eta}^*$ , so the bound may still be large.

In both examples of Johansson et al. [54] and Zhao et al. [125], the considered  $\eta$ , although achieving both desiderata, is not  $\eta^*$ , and this  $\eta$  renders different optimal representation-level labeling functions on the two domains:  $g_{\eta}^* \neq \tilde{g}_{\eta}^*$ , so the bound is still large. Johansson et al. [54] claim that it is



necessary to require  $\eta$  to be invertible to make  $g_\eta^* = \tilde{g}_\eta^*$ , and develop a bound (Thm. 2) that explicitly shows the effect of the invertibility of  $\eta$ . The  $\eta$  functions in the examples are not invertible.

(2) For the bound Eq. (46). Applying the bound on the representation space  $\mathcal{S}$  gives:

$$\begin{aligned} \mathbb{E}_{\tilde{p}(s,y)}[\ell(g(s), y)] &\leq \mathbb{E}_{p(s,y)}[\ell(g(s), y)] + d_{\mathcal{G}\Delta\mathcal{G}}(\eta_\# [p_x], \eta_\# [\tilde{p}_x]) \\ &\quad + \inf_{g \in \mathcal{G}} [\mathbb{E}_{\tilde{p}(s,y)}[\ell(g(s), y)] + \mathbb{E}_{p(s,y)}[\ell(g(s), y)]], \end{aligned}$$

where  $p_{s,y} := (\eta, \text{id}_y)_\# [p_{x,y}]$  with  $\text{id}_y : (x, y) \mapsto y$  and similarly  $\tilde{p}_{s,y} := (\eta, \text{id}_y)_\# [\tilde{p}_{x,y}]$ . Note that  $\mathbb{E}_{p(s,y)}[\ell(g(s), y)] = \mathbb{E}_{p(x,y)}[\ell(g(\eta(x)), y)] = R(g \circ \eta)$  and similarly  $\mathbb{E}_{\tilde{p}(s,y)}[\ell(g(s), y)] = \tilde{R}(g \circ \eta)$ . So the last term on the r.h.s becomes  $\inf_{g \in \mathcal{G}} [\tilde{R}(g \circ \eta) + R(g \circ \eta)] = \lambda_{\mathcal{G} \circ \eta}$ , where  $\mathcal{G} \circ \eta := \{g \circ \eta : g \in \mathcal{G}\}$ , and the bound then reformulates to:

$$\tilde{R}(g \circ \eta) \leq R(g \circ \eta) + d_{\mathcal{G}\Delta\mathcal{G}}(\eta_\# [p_x], \eta_\# [\tilde{p}_x]) + \lambda_{\mathcal{G} \circ \eta}. \quad (48)$$

This result is shown by Johansson et al. [54]. They argue that finding  $\eta$  that achieves both DIR and  $R(h^*)$  simultaneously (with some  $g_\eta^*$ ) cannot guarantee a tighter bound since the last term  $\lambda_{\mathcal{G} \circ \eta}$  may be very large.

In both examples of Johansson et al. [54] and Zhao et al. [125], it holds that  $\text{supp}(p_x) \cap \text{supp}(\tilde{p}_x) = \emptyset$ . It may cause the problem that  $g \circ \eta$  is very different from  $h^*$  on  $\text{supp}(\tilde{p}_x)$  even when  $R(h^*)$  is achieved, since  $R(g \circ \eta) = R(h^*)$  only constraints the behavior of  $g \circ \eta$  on  $\text{supp}(p_x)$ . The developed bound by Johansson et al. [54, Thm. 2] also explicitly shows the role of a support overlap, thus is called a support-invertibility bound. They also give an example showing that DIR (particularly implemented by minimizing MMD) is not necessary (“sometimes too strict”) for learning the shared/invariant  $p(y|x)$ .

The problem of DA-DIR is also studied under more modern bounds (3) (4) and arguments (5).

(3) A third bound. Zhao et al. [125] develop another bound for binary classification  $\mathcal{Y} := \{0, 1\}$ , under the risk function  $R(h) := \mathbb{E}_{p(x)}[|h^*(x) - h(x)|]$ . The bound is expressed in terms of the JS distance [29]  $d_{\text{JS}}(p, q) := \sqrt{\text{JS}(p, q)}$ , where  $\text{JS}(p, q)$  is the JS divergence, which is bounded:  $0 \leq \text{JS}(p, q) \leq 1$ <sup>16</sup>. It is shown that [125, Lemma 4.8]:

$$d_{\text{JS}}(p_y, \tilde{p}_y) \leq d_{\text{JS}}(\eta_\# [p_x], \eta_\# [\tilde{p}_x]) + \sqrt{R(g \circ \eta)} + \sqrt{\tilde{R}(g \circ \eta)}.$$

If  $d_{\text{JS}}(p_y, \tilde{p}_y) \geq d_{\text{JS}}(\eta_\# [p_x], \eta_\# [\tilde{p}_x])$ <sup>17</sup>, the bound is given as [125, Thm. 4.3]:

$$R(g \circ \eta) + \tilde{R}(g \circ \eta) \geq \frac{1}{2} (d_{\text{JS}}(p_y, \tilde{p}_y) - d_{\text{JS}}(\eta_\# [p_x], \eta_\# [\tilde{p}_x]))^2, \quad (49)$$

or when the two domains are allowed to have their own representation-level labeling functions  $g$  and  $\tilde{g}$ , we have [125, Corollary 4.1]:

$$R(g \circ \eta) + \tilde{R}(\tilde{g} \circ \eta) \geq \frac{1}{2} (d_{\text{JS}}(p_y, \tilde{p}_y) - d_{\text{JS}}(\eta_\# [p_x], \eta_\# [\tilde{p}_x]))^2. \quad (50)$$

When  $p(y) \neq \tilde{p}(y)$ , we have  $d_{\text{JS}}(p_y, \tilde{p}_y) > 0$ , so DIR, which minimizes  $d_{\text{JS}}(\eta_\# [p_x], \eta_\# [\tilde{p}_x])$ , becomes harmful to minimizing the target risk  $\tilde{R}(\tilde{g} \circ \eta)$ .

(4) Chuang et al. [23, Thm. 6] probe into the mysterious term  $\lambda_{\mathcal{G} \circ \eta}$  in the bound Eq. (48) and show how it is affected by the complexity of  $\mathcal{E}$  (the hypothesis space of  $\eta$ ):

$$\tilde{R}(g \circ \eta) \leq R(g \circ \eta) + d_{\mathcal{G}\Delta\mathcal{G}}(\eta_\# [p_x], \eta_\# [\tilde{p}_x]) + d_{\mathcal{G}\mathcal{E}\Delta\mathcal{E}}(p_x, \tilde{p}_x) + \lambda_{\mathcal{G} \circ \mathcal{E}}(\eta), \quad (51)$$

$$\text{where: } d_{\mathcal{G}\mathcal{E}\Delta\mathcal{E}}(p_x, \tilde{p}_x) := \sup_{g \in \mathcal{G}; \eta, \eta' \in \mathcal{E}} |\mathbb{E}_{p_x}[\ell(g \circ \eta, g \circ \eta')] - \mathbb{E}_{\tilde{p}_x}[\ell(g \circ \eta, g \circ \eta')]|,$$

$$\lambda_{\mathcal{G} \circ \mathcal{E}}(\eta) := \inf_{g' \in \mathcal{G}, \eta' \in \mathcal{E}} 2R(g' \circ \eta) + R(g' \circ \eta') + \tilde{R}(g' \circ \eta').$$

<sup>16</sup>This bound is under the unit of bits, *i.e.*, base 2 logarithm is used in the KL divergence defining the JS divergence. Under the unit of nats, *i.e.*, the natural logarithm  $\ln$  is used, the bound becomes  $0 \leq \text{JS}(p, q) \leq \ln 2$ .

<sup>17</sup>Unfortunately, it seems that the opposite direction of the inequality holds when there exist  $\eta^*$  and  $g^*$  (unnecessarily the ones in the strong existence assumption or Assumption 3 of Johansson et al. [54]) such that  $p_y = (g^* \circ \eta^*)_\# [p_x]$  and  $\tilde{p}_y = (g^* \circ \eta^*)_\# [\tilde{p}_x]$  and that  $\eta$  is a reparameterization of  $\eta^*$ , due to the celebrated data processing inequality.

Here,  $d_{\mathcal{G}\Delta\mathcal{G}}(\eta_{\#}[p_x], \eta_{\#}[\tilde{p}_x])$  measures the representation distribution difference,  $d_{\mathcal{G}\varepsilon\Delta\varepsilon}(p_x, \tilde{p}_x)$  measures the complexity of the representation-extractor family  $\mathcal{E}$  w.r.t  $\mathcal{G}$  [23, Def. 5], and  $\lambda_{\mathcal{G}\circ\varepsilon}(\eta)$  is “a variant of the best in-class joint risk”. For a given  $\mathcal{G}$ , although a more expressive  $\mathcal{E}$  lowers  $\lambda_{\mathcal{G}\circ\varepsilon}(\eta)$  and contains a more capable  $\eta$  to reduce  $d_{\mathcal{G}\Delta\mathcal{G}}(\eta_{\#}[p_x], \eta_{\#}[\tilde{p}_x])$ , such an  $\mathcal{E}$  also incurs a larger  $d_{\mathcal{G}\varepsilon\Delta\varepsilon}(p_x, \tilde{p}_x)$ , so there is a trade-off when choosing a proper  $\mathcal{E}$ . Chuang et al. [23] illustrate this trade-off by a toy example, and observe this trade-off in experiments. Similarly, there is also a trade-off in the complexity of  $\mathcal{G}$  (a more expressive  $\mathcal{G}$  lowers  $\lambda_{\mathcal{G}\circ\varepsilon}(\eta)$  but increases  $d_{\mathcal{G}\Delta\mathcal{G}}(\eta_{\#}[p_x], \eta_{\#}[\tilde{p}_x])$  and  $d_{\mathcal{G}\varepsilon\Delta\varepsilon}(p_x, \tilde{p}_x)$ ), but Chuang et al. [23] find the performance of DA-DIR much less sensitive to it empirically. They also point out the implication of this trade-off in choosing which layer in a neural network as the representation (Prop. 7) with an empirical study.

Chuang et al. [23] also propose a method to estimate the target-domain performance (*i.e.*, the OOD generalization performance) in terms of  $\tilde{R}(h)$  of a supervised model  $h$  using a set of DA-DIR models  $\hat{\mathcal{H}}^*$ . The method is supported by its Lemma 4:  $\left| \tilde{R}(h) - \sup_{h' \in \hat{\mathcal{H}}^*} \mathbb{E}_{\tilde{p}(x)}[\ell(h(x), h'(x))] \right| \leq \sup_{h' \in \hat{\mathcal{H}}^*} \tilde{R}(h')$ . The supremum on the l.h.s can be estimated using unsupervised data on the target domain, and it is treated as an estimate to  $\tilde{R}(h)$  given that the r.h.s is believed to be small for DA-DIR models  $\hat{\mathcal{H}}^*$ .

(5) Arjovsky et al. [2] point out that in the covariate shift case  $p(y|s) = \tilde{p}(y|s)$ , achieving DIR  $p(s) = \tilde{p}(s)$  implies  $p(y) = \tilde{p}(y)$  (since  $p(s)p(y|s) = \tilde{p}(s)\tilde{p}(y|s)$ ). This may not hold in practice. When it does not hold, the bound Eq. (49) shows that DIR may limit the target-domain performance.

**Comparison with CSG** The key feature of our CSG is that it is based on causal invariance. In most of the above bounds, including Eqs. (45, 46) for general DA and Eqs. (47, 48, 49, 51) for DA-DIR, the same labeling function  $h$  or  $g \circ \eta$  is used in both domains (the risks  $R$  and  $\tilde{R}$  on both domains measure the same  $h$  or  $g \circ \eta$ ). So for successful adaptation, covariate shift (invariant  $h^*$  or  $p(y|x)$ ) is a basic assumption, which implies inference invariance (invariant  $\eta^*$  or  $p(s|x)$ ) for DA-DIR. Yet, as explained in Sec. 3.2, since the data at hand is produced from a certain mechanism of nature anyway, the invariance in the causal generative direction  $p(x|s, v)$  is more fundamental and reliable than covariate shift or inference invariance. The causal invariance allows  $p(s) \neq \tilde{p}(s)$  and subsequently a difference in the inference direction:  $p(s|x) \neq \tilde{p}(s|x)$  or  $\eta^* \neq \tilde{\eta}^*$ , and  $p(y|x) \neq \tilde{p}(y|x)$  or  $h^* \neq \tilde{h}^*$ . Following this new philosophy, CSG-ind and CSG-DA use a different inference and prediction rule in the target domain, and Theorems 6 and 7 give OOD prediction guarantees for this different prediction rule. This is in contrast to most existing DA methods and theory.

Another advantage of CSG is that it has an identifiability guarantee (Thm. 5). In the above analyses (1) and (2), we see that the problem of DA-DIR arises since achieving both DIR and  $R(h^*)$  simultaneously cannot guarantee  $\eta = \eta^*$  or  $g = g^*$  or  $g \circ \eta = h^*$  on  $\text{supp}(p_x, \tilde{p}_x)$ , even in some sense of semantic or performance equivalence. This is essentially an identifiability problem. CSG achieves identifiability by fitting the entire data distribution  $p(x, y)$ . In contrast, DA-DIR is not a generative method, and only fits  $p(y|x)$ . Although DA-DIR also seeks to achieve DIR, it is a weaker goal than fitting  $p(x)$  (DIR cannot give  $p(x)$ ). So DA-DIR does not fully exploit the data distribution  $p(x, y)$ , and identifiability is a problem even with the strong assumption of both covariate shift and the strong existence assumption.

In terms of the considered quantity in the bounds, all the existing ones above bound the objective of the target risk  $\tilde{R}(h)$  in terms of the accessible source risk  $R(h)$  for an arbitrary labeling function  $h$ , while our bound Eq. (36) relates the target risks of the optimally-learned source-domain labeling function  $h^*$  and of the target-domain oracle labeling function  $\tilde{h}^*$ , *i.e.*, it bounds  $|\tilde{R}(h^*) - \tilde{R}(\tilde{h}^*)|$ . It measures the risk gap of the best source labeling function on the target domain. After adaptation, Thm. 7 (Eq. (44)) shows that CSG-DA achieves the optimal labeling function on the target domain.

Under bounds Eqs. (49, 50), we are not minimizing  $d_{\text{JS}}(\eta_{\#}[p(x)], \eta_{\#}[\tilde{p}(x)])$ , so our method is good under that view. In fact, in CSG the representation distributions on the two domains are  $p(s) = \int p(s, v) dv$  and  $\tilde{p}(s) = \int \tilde{p}(s, v) dv$  (replacing  $\eta_{\#}[p(x)]$  and  $\eta_{\#}[\tilde{p}(x)]$ ). They are generally different and we do not seek to match them.

## F Methodology Details

### F.1 Derivation of Learning Objectives

#### F.1.1 The Evidence Lower Bound (ELBO).

A common and effective approach to let the model  $p$  match the data distribution  $p^*(x, y)$  is maximizing likelihood, that is to maximize  $\mathbb{E}_{p^*(x, y)}[\log p(x, y)]$ . It is equivalent to minimizing  $\text{KL}(p^*(x, y) \| p(x, y))$  (since  $\mathbb{E}_{p^*(x, y)}[\log p^*(x, y)]$  is constant of  $p$ ), so it drives  $p(x, y)$  towards  $p^*(x, y)$ . But the likelihood function  $p(x, y) = \int p(s, v, x, y) \text{d}s \text{d}v$  involves an intractable integration, which is hard to estimate and optimize. To address this, the popular method of *variational expectation-maximization* (variational EM) introduces a tractable (has closed-form density function and easy to draw samples from it) distribution  $q(s, v|x, y)$  of the latent variables given observed variables, and a lower bound of the likelihood function can be derived:

$$\begin{aligned} \log p(x, y) &= \log \mathbb{E}_{p(s, v)}[p(s, v, x, y)] = \log \mathbb{E}_{q(s, v|x, y)} \left[ \frac{p(s, v, x, y)}{q(s, v|x, y)} \right] \\ &\geq \mathbb{E}_{q(s, v|x, y)} \left[ \log \frac{p(s, v, x, y)}{q(s, v|x, y)} \right] =: \mathcal{L}_{p, q_{s, v|x, y}}(x, y), \end{aligned} \quad (52)$$

where the inequality follows Jensen's inequality and the concavity of the log function. The function  $\mathcal{L}_{p, q_{s, v|x, y}}(x, y)$  is thus called *Evidence Lower Bound* (ELBO). The tractable distribution  $q(s, v|x, y)$  is called *variational distribution*, and is commonly instantiated by a standalone model (from the generative model) called an *inference model*. Moreover, we have:

$$\begin{aligned} &\mathcal{L}_{p, q_{s, v|x, y}}(x, y) + \text{KL}(q(s, v|x, y) \| p(s, v|x, y)) \\ &= \mathbb{E}_{q(s, v|x, y)} \left[ \log \frac{p(s, v, x, y)}{q(s, v|x, y)} \right] + \mathbb{E}_{q(s, v|x, y)} \left[ \log \frac{q(s, v|x, y)}{p(s, v|x, y)} \right] \\ &= \mathbb{E}_{q(s, v|x, y)} \left[ \log \frac{p(s, v, x, y)}{p(s, v|x, y)} \right] = \mathbb{E}_{q(s, v|x, y)}[\log p(x, y)] \\ &= \log p(x, y), \end{aligned}$$

so maximizing  $\mathcal{L}_{p, q_{s, v|x, y}}(x, y)$  w.r.t  $q(s, v|x, y)$  is equivalent to minimizing  $\text{KL}(q(s, v|x, y) \| p(s, v|x, y))$  (since the r.h.s  $\log p(x, y)$  is constant of  $q(s, v|x, y)$ ), which drives  $q(s, v|x, y)$  towards the true posterior (*i.e.*, the goal of *variational inference*), and once this is (perfectly) done,  $\mathcal{L}_{p, q_{s, v|x, y}}(x, y)$  becomes a lower bound of  $\log p(x, y)$  that is tight at the current model  $p$ , so maximizing  $\mathcal{L}_{p, q_{s, v|x, y}}(x, y)$  w.r.t  $p$  effectively maximizes  $\log p(x, y)$  (*i.e.*, the goal of maximizing likelihood). So the training objective becomes the expected ELBO  $\mathbb{E}_{p^*(x, y)}[\mathcal{L}_{p, q_{s, v|x, y}}(x, y)]$ . Optimizing it w.r.t  $q(s, v|x, y)$  and  $p$  alternately drives  $q(s, v|x, y)$  towards  $p(s, v|x, y)$  and  $p(x, y)$  towards  $p^*(x, y)$  eventually. The derivations and conclusions above hold for general latent variable models, with  $(s, v)$  representing the latent variables, and  $(x, y)$  observed variables (data variables).

This standard form of ELBO gives the objective for fitting unsupervised test-domain data from the underlying data distribution  $\tilde{p}^*(x)$ . In this case, the observed variable is only  $x$  while the latent variable is still  $(s, v)$ , so the required joint distribution for latent and observed variables is  $\tilde{p}(s, v, x) = \tilde{p}(s, v)p(x|s, v)$ , and the inference model is in the form  $\tilde{q}(s, v|x)$ . Following the form of Eq. (52), the ELBO objective for fitting  $\tilde{p}^*(x)$  (*i.e.*, the lower bound for  $\log \tilde{p}(x)$ ) is:

$$\mathcal{L}_{\tilde{p}, \tilde{q}_{s, v|x}}(x) = \mathbb{E}_{\tilde{q}(s, v|x)} \left[ \log \frac{\tilde{p}(s, v, x)}{\tilde{q}(s, v|x)} \right].$$

This leads to Eq. (4).

#### F.1.2 Variational EM for learning CSG.

In the supervised case, the expected ELBO objective  $\mathbb{E}_{p^*(x, y)}[\mathcal{L}_{p, q_{s, v|x, y}}(x, y)]$  can also be understood as the conventional supervised learning loss, *i.e.* the cross entropy, regularized by a generative reconstruction term. As explained in the main text (Sec. 4), after training, we only have the model  $p(s, v, x, y)$  and an approximation  $q(s, v|x, y)$  to the posterior  $p(s, v|x, y)$ , and prediction using  $p(y|x)$  is still intractable. So we employ a tractable distribution  $q(s, v, y|x)$  to model the required variational distribution as  $q(s, v|x, y) = q(s, v, y|x)/q(y|x)$ , where  $q(y|x) = \int q(s, v, y|x) \text{d}s \text{d}v$

is the derived marginal distribution of  $y$  from  $q(s, v, y|x)$  (we will show that it can be effectively estimated and sampled from). With this instantiation, the expected ELBO becomes:

$$\begin{aligned}
& \mathbb{E}_{p^*(x,y)}[\mathcal{L}_{p, q_{s,v|x,y}=\dots(q_{s,v,y|x})}(x, y)] \\
&= \int p^*(x, y) \frac{q(s, v, y|x)}{q(y|x)} \log \frac{p(s, v, x, y)q(y|x)}{q(s, v, y|x)} \, dsdvdx dy \\
&= \int p^*(x, y) \frac{q(s, v, y|x)}{q(y|x)} \log q(y|x) \, dsdvdx dy + \int p^*(x, y) \frac{q(s, v, y|x)}{q(y|x)} \log \frac{p(s, v, x, y)}{q(s, v, y|x)} \, dsdvdx dy \\
&= \int p^*(x) \left( \int p^*(y|x) \frac{\int q(s, v, y|x) \, dsdv}{q(y|x)} \log q(y|x) \, dy \right) dx \\
&\quad + \int p^*(x) \left( \int \frac{p^*(y|x)}{q(y|x)} q(s, v, y|x) \log \frac{p(s, v, x, y)}{q(s, v, y|x)} \, dsdvdy \right) dx \\
&= \mathbb{E}_{p^*(x)} \mathbb{E}_{p^*(y|x)} [\log q(y|x)] + \mathbb{E}_{p^*(x)} \mathbb{E}_{q(s,v,y|x)} \left[ \frac{p^*(y|x)}{q(y|x)} \log \frac{p(s, v, x, y)}{q(s, v, y|x)} \right],
\end{aligned}$$

which is Eq. (1). Here, we use the shorthand “ $q_{s,v|x,y} = \dots(q_{s,v,y|x})$ ” for the above substitution  $q(s, v|x, y) = q(s, v, y|x) / \int q(s, v, y|x) \, dsdv$  and highlight the argument therein. The first term is the (negative) expected cross entropy loss, which drives the inference model (predictor)  $q(y|x)$  towards  $p^*(y|x)$  for  $p^*(x)$ -a.e.  $x$ . Once this is (perfectly) done, the second term becomes  $\mathbb{E}_{p^*(x)} \mathbb{E}_{q(s,v,y|x)} [\log (p(s, v, x, y) / q(s, v, y|x))]$ , which is the expected ELBO  $\mathbb{E}_{p^*(x)} [\mathcal{L}_{p, q_{s,v,y|x}}(x, y)]$  for  $q(s, v, y|x)$ . It thus drives  $q(s, v, y|x)$  towards  $p(s, v, y|x)$  and  $p(x)$  towards  $p^*(x)$ . It accounts for a regularization by fitting the input distribution  $p^*(x)$  and align the inference model (predictor) with the generative model.

The target of  $q(s, v, y|x)$ , i.e.  $p(s, v, y|x)$ , adopts a factorization  $p(s, v, y|x) = p(s, v|x)p(y|s)$  due to the graphical structure (Fig. 1a) of CSG (i.e.,  $y \perp (x, v) \mid s$ ). The factor  $p(y|s)$  is known (the invariant causal mechanism to generate  $y$  in CSG), so we only need to employ an inference model  $q(s, v|x)$  for the intractable factor  $p(s, v|x)$ , so  $q(s, v, y|x) = q(s, v|x)p(y|s)$ . Using this relation, we can reformulate Eq. (1) as:

$$\begin{aligned}
& \mathbb{E}_{p^*(x,y)}[\mathcal{L}_{p, q_{s,v|x,y}=\dots(q_{s,v|x}, p_{y|s})}(x, y)] \\
&= \mathbb{E}_{p^*(x,y)} [\log q(y|x)] + \mathbb{E}_{p^*(x)} \left[ \int q(s, v|x)p(y|s) \frac{p^*(y|x)}{q(y|x)} \log \frac{p(s, v, x)}{q(s, v|x)} \, dsdvdy \right] \\
&= \mathbb{E}_{p^*(x,y)} [\log q(y|x)] + \mathbb{E}_{p^*(x)} \left[ \int \frac{p^*(y|x)}{q(y|x)} \left( \int q(s, v|x)p(y|s) \log \frac{p(s, v, x)}{q(s, v|x)} \, dsdv \right) dy \right] \\
&= \mathbb{E}_{p^*(x,y)} [\log q(y|x)] + \mathbb{E}_{p^*(x,y)} \left[ \frac{1}{q(y|x)} \mathbb{E}_{q(s,v|x)} \left[ p(y|s) \log \frac{p(s, v, x)}{q(s, v|x)} \right] \right], \tag{53}
\end{aligned}$$

which is Eq. (2). We used the shorthand “ $q_{s,v|x,y} = \dots(q_{s,v|x}, p_{y|s})$ ” for the substitution for  $q(s, v|x, y)$  using  $q(s, v|x)$  and  $p(y|s)$ . With this form of  $q(s, v, y|x) = q(s, v|x)p(y|s)$ , we have  $q(y|x) = \mathbb{E}_{q(s,v|x)} [p(y|s)]$  which can also be estimated and optimized using reparameterization. For prediction, we can sample from the approximation  $q(y|x)$  instead of the intractable  $p(y|x)$ . This can be done by ancestral sampling: first sample  $(s, v)$  from  $q(s, v|x)$ , and then use the sampled  $s$  to sample  $y$  from  $p(y|s)$ .

### F.1.3 Variational EM for learning CSG with test-domain inference model (Learning CSG-ind and CSG-DA on the training domain).

See the main text in Sec. 4.1 and Sec. 4.2 for motivations and the basic idea of the methods. Methods for CSG-ind and CSG-DA are similar, so we mainly show the detailed derivation for CSG-ind.

Since the prior is the only difference between  $p(s, v, x, y)$  and  $p^\perp(s, v, x, y)$ , we have  $\frac{p(s,v,x,y)}{p^\perp(s,v,x,y)} = \frac{p(s,v)}{p^\perp(s,v)}$ . So  $p(s, v, y|x) = \frac{p(s,v)}{p^\perp(s,v)} \frac{p^\perp(x)}{p(x)} p^\perp(s, v, y|x)$ . As explained, inference models now only need to approximate the posterior  $(s, v) \mid x$ . Since  $p(s, v, y|x) = p(s, v|x)p(y|s)$  and  $p^\perp(s, v, y|x) = p^\perp(s, v|x)p(y|s)$  share the same  $p(y|s)$  factor, we have  $p(s, v|x) = \frac{p(s,v)}{p^\perp(s,v)} \frac{p^\perp(x)}{p(x)} p^\perp(s, v|x)$ . The variational distributions  $q(s, v|x)$  and  $q^\perp(s, v|x)$  target  $p(s, v|x)$  and  $p^\perp(s, v|x)$  respectively, so we

can express the former with the latter:

$$q(s, v|x) = \frac{p(s, v)}{p^\perp(s, v)} \frac{p^\perp(x)}{p(x)} q^\perp(s, v|x). \quad (54)$$

Once  $q^\perp(s, v|x)$  achieves its goal, such represented  $q(s, v|x)$  also does so. So we only need to construct an inference model for  $q^\perp(s, v|x)$  and optimize it. With this representation, we have:

$$\begin{aligned} q(y|x) &= \mathbb{E}_{q(s, v|x)}[p(y|s)] = \mathbb{E}_{q^\perp(s, v|x)} \left[ \frac{p(s, v)}{p^\perp(s, v)} \frac{p^\perp(x)}{p(x)} p(y|s) \right] = \frac{p^\perp(x)}{p(x)} \mathbb{E}_{q^\perp(s, v|x)} \left[ \frac{p(s, v)}{p^\perp(s, v)} p(y|s) \right] \\ &= \frac{p^\perp(x)}{p(x)} \pi(y|x), \end{aligned} \quad (55)$$

where  $\pi(y|x) := \mathbb{E}_{q^\perp(s, v|x)} \left[ \frac{p(s, v)}{p^\perp(s, v)} p(y|s) \right]$  as in the main text, which can be estimated and optimized using the reparameterization of  $q^\perp(s, v|x)$ . From Eq. (2), the expected ELBO training objective can be reformulated as:

$$\begin{aligned} &\mathbb{E}_{p^*(x, y)} [\mathcal{L}_{p, q_{s, v|x, y} = \dots (q^\perp_{s, v|x}, p)}(x, y)] \\ &= \mathbb{E}_{p^*(x, y)} \left[ \log q(y|x) + \frac{1}{q(y|x)} \mathbb{E}_{q(s, v|x)} [p(y|s) \log \frac{p(s, v, x)}{q(s, v|x)}] \right] \\ &= \mathbb{E}_{p^*(x, y)} \left[ \log \frac{p^\perp(x)}{p(x)} + \log \pi(y|x) \right. \\ &\quad \left. + \frac{p(x)}{p^\perp(x)} \frac{1}{\pi(y|x)} \mathbb{E}_{q^\perp(s, v|x)} \left[ \frac{p(s, v)}{p^\perp(s, v)} \frac{p^\perp(x)}{p(x)} p(y|s) \log \frac{p(s, v)p(x|s, v)}{p^\perp(s, v) \frac{p^\perp(x)}{p(x)} q^\perp(s, v|x)} \right] \right] \\ &= \mathbb{E}_{p^*(x, y)} \left[ \log \frac{p^\perp(x)}{p(x)} + \log \pi(y|x) \right. \\ &\quad \left. + \frac{1}{\pi(y|x)} \mathbb{E}_{q^\perp(s, v|x)} \left[ \frac{p(s, v)}{p^\perp(s, v)} p(y|s) \left( \log \frac{p(x)}{p^\perp(x)} + \log \frac{p^\perp(s, v)p(x|s, v)}{q^\perp(s, v|x)} \right) \right] \right] \\ &= \mathbb{E}_{p^*(x, y)} \left[ \log \frac{p^\perp(x)}{p(x)} + \log \pi(y|x) + \frac{1}{\pi(y|x)} \mathbb{E}_{q^\perp(s, v|x)} \left[ \frac{p(s, v)}{p^\perp(s, v)} p(y|s) \right] \log \frac{p(x)}{p^\perp(x)} \right. \\ &\quad \left. + \frac{1}{\pi(y|x)} \mathbb{E}_{q^\perp(s, v|x)} \left[ \frac{p(s, v)}{p^\perp(s, v)} p(y|s) \log \frac{p^\perp(s, v)p(x|s, v)}{q^\perp(s, v|x)} \right] \right] \\ &= \mathbb{E}_{p^*(x, y)} \left[ \log \frac{p^\perp(x)}{p(x)} + \log \pi(y|x) + \frac{1}{\pi(y|x)} \pi(y|x) \log \frac{p(x)}{p^\perp(x)} \right. \\ &\quad \left. + \frac{1}{\pi(y|x)} \mathbb{E}_{q^\perp(s, v|x)} \left[ \frac{p(s, v)}{p^\perp(s, v)} p(y|s) \log \frac{p^\perp(s, v, x)}{q^\perp(s, v|x)} \right] \right] \\ &= \mathbb{E}_{p^*(x, y)} \left[ \log \pi(y|x) + \frac{1}{\pi(y|x)} \mathbb{E}_{q^\perp(s, v|x)} \left[ \frac{p(s, v)}{p^\perp(s, v)} p(y|s) \log \frac{p^\perp(s, v, x)}{q^\perp(s, v|x)} \right] \right], \end{aligned} \quad (56)$$

where in the second-last equality we have used the definition of  $\pi(y|x)$ . The shorthand “ $q_{s, v|x, y} = \dots (q^\perp_{s, v|x}, p)$ ” represents the substitution using  $q^\perp(s, v|x)$  and  $p = \langle p(s, v), p(x|s, v), p(y|s) \rangle$  for  $q(s, v|x, y) = q(s, v|x)p(y|s) / \int q(s, v|x)p(y|s) dsdv$  where  $q(s, v|x)$  is determined by  $q^\perp(s, v|x)$  and  $p$  via Eq. (54) (recall that  $p^\perp(s, v)$  is determined by  $p(s, v)$ , so  $p^\perp(x)$  is also determined by  $p(s, v)$  and  $p(x|s, v)$ ). This Eq. (56) gives Eq. (3) for CSG-ind. Note that  $\pi(y|x)$  is not used in prediction, so there is no need to sample from it. Prediction is done by ancestral sampling from  $q^\perp(y|x)$ , that is to first sample from  $q^\perp(s, v|x)$  and then from  $p(y|s)$ . Using this reformulation, we can train a CSG with independent prior even on data that manifests a correlated prior.

For CSG-DA, we only need to replace the independent prior  $p^\perp(s, v)$  hypothesized for the test domain with the standalone prior model  $\tilde{p}(s, v)$  dedicated to learning the test-domain prior, and re-denote the test-domain inference model  $q^\perp(s, v|x)$  with  $\tilde{q}(s, v|x)$ . By doing so, Eq. (56) gives Eq. (5), *i.e.* the objective for CSG-DA on the training domain. For numerical stability, we employ the log-sum-exp trick to estimate the expectations and compute the gradients.

### F.1.4 Methods for CSGz for ablation study.

The conclusions and methods can also be applied to general latent-variable generative models for supervised learning, by replacing  $(s, v)$  with their latent variables. Particularly, the method also applies to the counterpart of CSG in the ablation study experiment, which does not distinguish the two latent factors  $s$  and  $v$  and treats them as a united latent variable  $z = (s, v)$ . We thus call it **CSGz**. The essential difference from CSG is that CSGz keeps the  $v \rightarrow y$  arrow, which is unlikely a causal relation as we argued in Sec. 3, item (4). Formally, a CSGz model is defined as the tuple  $p := \langle p(z), p(x|z), p(y|z) \rangle$ , and the corresponding inference model is in the form  $q(z|x)$ .

Following a similar derivation of Eq. (53), we have the objective for fitting training-domain data:

$$\begin{aligned} & \mathbb{E}_{p^*(x,y)} [\mathcal{L}_{p, q_{z|x,y} = \dots (q_{z|x}, p_{y|z})}(x, y)] \\ &= \mathbb{E}_{p^*(x,y)} [\log q(y|x)] + \mathbb{E}_{p^*(x,y)} \left[ \frac{1}{q(y|x)} \mathbb{E}_{q(z|x)} \left[ p(y|z) \log \frac{p(z,x)}{q(z|x)} \right] \right], \end{aligned}$$

where  $q(y|x) = \mathbb{E}_{q(z|x)} [p(y|z)]$ . The shorthand “ $q_{z|x,y} = \dots (q_{z|x}, p_{y|z})$ ” is similarly for the substitution  $q(z|x, y) = q(z|x)p(y|z) / \int q(z|x)p(y|z) dz$  using  $q(z|x)$  and  $p(y|z)$ .

As CSGz does not consider the distinction between  $s$  and  $v$ , there is no CSGz-ind version. The CSGz-DA version for domain adaptation is possible by using a standalone prior model  $\tilde{p}(z)$  for the test domain, which is learned by optimizing the corresponding ELBO objective similar to Eq. (4):

$$\max_{\tilde{p}, \tilde{q}_{z|x}} \mathbb{E}_{\tilde{p}^*(x)} [\mathcal{L}_{\tilde{p}, \tilde{q}_{z|x}}(x)], \text{ where } \mathcal{L}_{\tilde{p}, \tilde{q}_{z|x}}(x) = \mathbb{E}_{\tilde{q}(z|x)} \left[ \log \frac{\tilde{p}(z)p(x|z)}{\tilde{q}(z|x)} \right].$$

To fit training-domain data using the test-domain inference model  $\tilde{q}(z|x)$ , following a similar derivation of Eq. (56), we have the objective on the training domain for CSG-DA:

$$\max_{\tilde{p}, \tilde{q}_{z|x}} \mathbb{E}_{p^*(x,y)} \left[ \log \pi(y|x) + \frac{1}{\pi(y|x)} \mathbb{E}_{\tilde{q}(z|x)} \left[ \frac{p(z)}{\tilde{p}(z)} p(y|z) \log \frac{\tilde{p}(z)p(x|z)}{\tilde{q}(z|x)} \right] \right],$$

where  $\pi(y|x) := \mathbb{E}_{\tilde{q}(z|x)} \left[ \frac{p(z)}{\tilde{p}(z)} p(y|z) \right]$ .

## F.2 Instantiating the Inference Model

Although motivated from learning a generative model, the method can be implemented using a general discriminative model (with hidden nodes) with causal behavior. By parsing some of the hidden nodes as  $s$  and some others as  $v$ , a discriminative model could formalize a distribution  $q(s, v, y|x)$ , which implements the inference model and the generative mechanism  $p(y|s)$ . The parsing mode is shown in Fig. 3, which is based on the following consideration.

(1) The graphical structure of CSG in Fig. 1a indicates that  $(v, x) \perp\!\!\!\perp y \mid s$ , so the hidden nodes for  $s$  should isolate  $y$  from  $v$  and  $x$ . The model then factorizes the distribution as  $q(s, v, y|x) = q(s, v|x)q(y|s)$ , and since the inference and generative models share the distribution on  $y|s$  (see the main text for explanation), we can thus use the component  $q(y|s)$  given by the discriminative model to implement the generative mechanism  $p(y|s)$ .

(2) The graphical structure in Fig. 1a also indicates that  $s \not\perp\!\!\!\perp v \mid x$  due to the v-structure (collider) at  $x$  (“explain away”). The component  $q(s, v|x)$  should embody this dependence, so the hidden nodes chosen as  $v$  should have an effect on those as  $s$ . Note that the arrows in Fig. 3 represent computation directions but not causal directions. We orient the computation direction  $v \rightarrow s$  since all hidden nodes in a discriminative model eventually contribute to computing  $y$ .

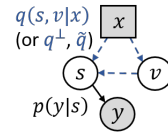

Figure 3: Parsing a general discriminative model as an inference model for CSG. The black solid arrow constructs  $p(y|s)$  in the generative model, and the blue dashed arrows (representing computational but not causal directions) construct  $q(s, v|x)$  (or  $q^\perp(s, v|x)$  or  $\tilde{q}(s, v|x)$ ) as the inference model.

After parsing, the discriminative model gives a mapping  $(s, v) = \eta(x)$ . We implement the distribution by<sup>18</sup>  $q(s, v|x) = \mathcal{N}(s, v|\eta(x), \Sigma_q)$ . For all the three cases of CSG, CSG-ind and CSG-DA, only one inference model for  $(s, v) | x$  is required. The component  $(s, v) | x$  of the discriminative model thus parameterizes  $q^\perp(s, v|x)$  and  $\tilde{q}(s, v|x)$  for CSG-ind and CSG-DA. The expectations in all objectives (except for expectations over  $p^*$  which are estimated by averaging over data) are all under the respective  $(s, v) | x$ . They can be estimated using  $\eta(x)$  by the reparameterization trick [62], and the gradients can be back-propagated.

We need two more components beyond the discriminative model to implement the method, *i.e.* the prior  $p(s, v)$  and the generative mechanism  $p(x|s, v)$ . The latter can be implemented using a generator or decoder architecture comparable to the component  $q(s, v|x)$ . The prior can be commonly implemented using a multivariate Gaussian distribution,  $p(s, v) = \mathcal{N}\left(\begin{pmatrix} s \\ v \end{pmatrix} \middle| \begin{pmatrix} \mu_s \\ \mu_v \end{pmatrix}, \Sigma = \begin{pmatrix} \Sigma_{ss} & \Sigma_{sv} \\ \Sigma_{vs} & \Sigma_{vv} \end{pmatrix}\right)$ . In implementation, the means  $\mu_s$  and  $\mu_v$  are fixed as zero vectors. We parameterize  $\Sigma$  via its Cholesky decomposition,  $\Sigma = LL^\top$ , where  $L$  is a lower-triangular matrix with positive diagonals, which is in turn parameterized as  $L = \begin{pmatrix} L_{ss} & 0 \\ M_{vs} & L_{vv} \end{pmatrix}$  with smaller lower-triangular matrices  $L_{ss}$  and  $L_{vv}$  and any matrix  $M_{vs}$ . Matrices  $L_{ss}$  and  $L_{vv}$  are parameterized by a summation of positive diagonals (guaranteed via an exponential map) and a lower-triangular (excluding diagonals) matrix. Training CSG-ind via Eq. (3) requires estimating the ratio  $\frac{p(s,v)}{p^\perp(s,v)} = \frac{p(s,v)}{p(s)p(v)} = \frac{p(v|s)}{p(v)}$ , where  $p(v) = \mathcal{N}(v|\mu_v, \Sigma_{vv})$  with  $\Sigma_{vv} = L_{vv}L_{vv}^\top + M_{vs}M_{vs}^\top$ , and the conditional distribution  $p(v|s)$  is given by  $p(v|s) = \mathcal{N}(v|\mu_{v|s}, \Sigma_{v|s})$  with  $\mu_{v|s} = \mu_v + M_{vs}L_{ss}^{-1}(s - \mu_s)$ ,  $\Sigma_{v|s} = L_{vv}L_{vv}^\top$  (see *e.g.*, Bishop [14]). This prior does not imply a causal direction between  $s$  and  $v$  (the linear Gaussian case of Zhang and Hyvärinen [122]) thus well serves as a prior for CSG.

### F.3 Model Selection Details

We use a validation set on the training domain for hyperparameter selection, to avoid overfitting due to the finiteness of training data samples, and to guarantee a good fit to the training-domain data distribution  $p^*(x, y)$  as the semantic-identifiability theorem 5 recommends. We note that model selection in OOD prediction tasks is itself controversial and nontrivial, and it is still an active research direction [120, 39]. It is argued that if a validation set from the test domain is available, the OOD setup that there is no supervision on the test domain is violated, and then a better choice would be to incorporate it in learning as the semi-supervised adaptation task, instead of using it just for validation. As our methods are designed to fit the training domain data and our theory shows guarantees under a good fit to the training-domain data distribution, model selection using a training-domain validation set is reasonable. This does not contradict the trade-off between training- and test-domain accuracies shown in some prior works (*e.g.*, [95]), since they consider arbitrary distribution change, and using the same prediction rule in both domains, while we leverage causal invariance and develop a different prediction rule in the test domain. In implementation, the training and validation sets are constructed by a 80%-20% random split of all training-domain data in each task.

More specifically, for hyperparameter selection, we align the scale of the supervision loss terms ( $\mathbb{E}_{p^*(x,y)}[\log \pi(y|x)]$  for CSG-ind/-DA and CSGz-DA, and the CE loss term for others) in the objectives of all methods, and tune the coefficients of the ELBOs to be their largest values that make the accuracy near 1 on the validation set, so that they wield the most power on the test domain while being faithful to explicit supervision. The coefficients are preferred to be large to well fit  $p^*(x)$  (and  $\tilde{p}^*(x)$  for domain adaptation) to gain generalizability in the test domain, while they should not affect training accuracy, which is required for a good fit to the training distribution.

For CSG-ind/-DA and CSGz-DA, since their inference models target the test domain, it is not reasonable to evaluate validation accuracy directly using them in the form of  $\mathbb{E}_{q^{\text{test}}(s,v|x)}[p(y|s)]$  ( $q^{\text{test}}$  here refers to  $q^\perp$  or  $\tilde{q}$ ). Instead, Eq. (55) shows that  $\pi(y|x) := \mathbb{E}_{q^{\text{test}}(s,v|x)}\left[\frac{p(s,v)}{p^{\text{test}}(s,v)}p(y|s)\right]$  ( $p^{\text{test}}(s, v)$  refers to  $p^\perp(s, v)$  or  $\tilde{p}(s, v)$ ) is an unnormalized density of  $q(y|x)$ , the training-domain predictor. So we evaluate  $\pi(y|x)$  for every value of  $y$  (which is not too large for classification tasks) and normalize them for the validation accuracy.

<sup>18</sup>Other approaches to introducing randomness are also possible, such as employing stochasticity on the parameters/weights as in Bayesian neural networks [82], or using dropout [106, 32]. Here we adopt this simple treatment to highlight the main contribution.

Compared with recent model selection methods [120, 119], our method does not introduce additional hyperparameters or assumptions, and does not require multiple training domains. These advantages stem from the explicit description of domain change of our CSG model based on the causal invariance principle 2.

## G Experiment Details

**The CSGz baseline for ablation study.** To show the benefit of modeling  $s$  and  $v$  separately, we consider a counterpart of CSG that does not separate its latent variable  $z$  into  $s$  and  $v$ ; or equivalently, it does not remove the edge  $v \rightarrow y$ . This means that all its latent variables in  $z$  directly (*i.e.*, not mediated by  $s$ ) affect the output  $y$ . We thus call it CSGz. Detailed methods for OOD generalization (CSGz; note it does not have a “-ind” version) and domain adaptation (CSGz-DA) are introduced in Appx. F.1.4. To align the model architecture for fair comparison, this means that the latent variable  $z$  of CSGz can only be taken as the latent variable  $s$  in CSG (see Appx. F.2, Fig. 3).

**More about the baselines.** The CSGz(-DA) baselines are implemented in our codebase along with the proposed CSG(-ind/-DA) methods. The CNBB method [41] as an OOD generalization baseline is also implemented, based on the description in the paper. For domain adaptation baseline methods DANN [33], DAN [73], CDAN [74] and MDD [124], we use their implementation in the `da.lib` package<sup>19</sup> [53]. The BNM method [25] is integrated into our codebase based on its official implementation<sup>20</sup>. Results of CE, DANN, DAN and CDAN are taken from [74] for the ImageCLEF-DA dataset and from [39] except DAN for the PACS and VLCS datasets. All methods share the same optimization setup.

Note that we do not consider domain generalization baselines (*e.g.*, invariant risk minimization [2]) as they degenerate to the CE baseline (*i.e.*, the standard supervised learning method, or empirical risk minimization) when given only one training domain.

**Computation infrastructure.** Each run of the experiment is on a single Tesla P100 GPU. All the experiments are implemented in PyTorch [84].

**More analysis on the results.** Complete results including the MDD, CSGz and CSGz-DA baselines, as well as the VLCS [30] dataset, are shown in Table 2 for OOD generalization and in Table 3 for domain adaptation. The complete results support the same conclusions in the main text.

In addition, for the **ablation study**, we observe that our CSG methods outperform CSGz methods in all tasks, demonstrating the benefit of modeling the semantic and variation factors separately. Also, CSGz methods usually have a larger variance, possibly due to the lack of semantic-identifiability so the learned representation gets misled by the variation factor more or less from run to run. On the other hand, CSGz methods still outperform existing methods most of the time, which are discriminative methods. This shows the advantage of using a *generative model*: the invariance of generative mechanisms (causal invariance) is more reliable.

From the domain adaptation results in Table 3, we note that the advantage of CSG-DA on ImageCLEF-DA is not as significant as on other datasets (shifted-MNIST, PACS, VLCS); existing methods CDAN and BNM achieve a comparable or sometimes better result than CSG-DA on ImageCLEF-DA. This reveals the **suitable problem** that our CSG methods solve the best, as discussed in the main text. We expand the analysis below.

Generally speaking, most domain adaptation methods are designed to extract prediction-informative features that are also common across domains, but at the risk to end up with such a feature that leverages a spurious correlation and misleads prediction. In contrast, our CSG methods can be seen to filter out misleading candidates of such features, but with the requirement for identifiability that the training domain shows a diverse  $v$  for each  $s$ . This requirement comes from the bounded prior condition in the identifiability theorem 5, or the intuition to reduce the risk of extreme cases (Thm. 5 Remark (1)).

For the ImageCLEF-DA task, there is no severe spurious correlation, since the style factor as  $v$  has no preference on a particular class in any domain. So existing domain adaptation methods do not

<sup>19</sup><https://github.com/thuml/Transfer-Learning-Library>

<sup>20</sup><https://github.com/cuishuhao/BNM>



Table 2: Test accuracy (%) for **OOD generalization** by various methods (ours in bold and line separated; CSGz baseline included) on **Shifted-MNIST** (top two rows), **ImageCLEF-DA** (mid-top four rows), **PACS** (mid-bottom four rows) and **VLCS** (bottom four rows) datasets. Results of CE are taken from [74] for ImageCLEF-DA and from [39] for PACS and VLCS. Averaged over 10 runs.

| task          |                                               | CE                             | CNBB           | CSGz           | CSG                            | CSG-ind                        |
|---------------|-----------------------------------------------|--------------------------------|----------------|----------------|--------------------------------|--------------------------------|
| Shifted-MNIST | $\delta_0 = \delta_1 = 0$                     | 42.9 $\pm$ 3.1                 | 54.7 $\pm$ 3.3 | 53.0 $\pm$ 6.7 | 81.4 $\pm$ 7.4                 | <b>82.6<math>\pm</math>4.0</b> |
|               | $\delta_0, \delta_1 \sim \mathcal{N}(0, 2^2)$ | 47.8 $\pm$ 1.5                 | 59.2 $\pm$ 2.4 | 54.8 $\pm$ 5.6 | 61.7 $\pm$ 3.6                 | <b>62.3<math>\pm</math>2.2</b> |
| ImageCLEF-DA  | <b>C<math>\rightarrow</math>P</b>             | 65.5 $\pm$ 0.3                 | 72.7 $\pm$ 1.1 | 73.3 $\pm$ 1.0 | 73.6 $\pm$ 0.6                 | <b>74.0<math>\pm</math>1.3</b> |
|               | <b>P<math>\rightarrow</math>C</b>             | 91.2 $\pm$ 0.3                 | 91.7 $\pm$ 0.2 | 91.6 $\pm$ 0.9 | 92.3 $\pm$ 0.4                 | <b>92.7<math>\pm</math>0.2</b> |
|               | <b>I<math>\rightarrow</math>P</b>             | 74.8 $\pm$ 0.3                 | 75.4 $\pm$ 0.6 | 77.0 $\pm$ 0.2 | 76.9 $\pm$ 0.3                 | <b>77.2<math>\pm</math>0.2</b> |
|               | <b>P<math>\rightarrow</math>I</b>             | 83.9 $\pm$ 0.1                 | 88.7 $\pm$ 0.5 | 90.4 $\pm$ 0.3 | 90.4 $\pm$ 0.3                 | <b>90.9<math>\pm</math>0.2</b> |
| PACS          | others $\rightarrow$ <b>P</b>                 | <b>97.8<math>\pm</math>0.0</b> | 96.9 $\pm$ 0.2 | 97.7 $\pm$ 0.3 | 97.7 $\pm$ 0.2                 | <b>97.8<math>\pm</math>0.2</b> |
|               | others $\rightarrow$ <b>A</b>                 | 88.1 $\pm$ 0.1                 | 73.1 $\pm$ 0.3 | 87.3 $\pm$ 0.8 | <b>88.5<math>\pm</math>0.6</b> | <b>88.6<math>\pm</math>0.6</b> |
|               | others $\rightarrow$ <b>C</b>                 | 77.9 $\pm$ 1.3                 | 50.2 $\pm$ 1.2 | 84.3 $\pm$ 0.9 | 84.4 $\pm$ 0.9                 | <b>84.6<math>\pm</math>0.8</b> |
|               | others $\rightarrow$ <b>S</b>                 | 79.1 $\pm$ 0.9                 | 43.3 $\pm$ 1.2 | 80.6 $\pm$ 1.4 | 80.7 $\pm$ 1.0                 | <b>81.1<math>\pm</math>1.2</b> |
| VLCS          | others $\rightarrow$ <b>V</b>                 | 76.4 $\pm$ 1.5                 | 75.5 $\pm$ 0.9 | 79.4 $\pm$ 1.0 | 79.3 $\pm$ 1.1                 | <b>80.0<math>\pm</math>0.9</b> |
|               | others $\rightarrow$ <b>L</b>                 | 63.3 $\pm$ 0.9                 | 61.1 $\pm$ 1.2 | 69.6 $\pm$ 0.8 | 69.6 $\pm$ 0.5                 | <b>70.1<math>\pm</math>0.8</b> |
|               | others $\rightarrow$ <b>C</b>                 | 97.6 $\pm$ 1.0                 | 97.1 $\pm$ 0.4 | 99.2 $\pm$ 0.3 | <b>99.4<math>\pm</math>0.3</b> | <b>99.5<math>\pm</math>0.2</b> |
|               | others $\rightarrow$ <b>S</b>                 | 72.2 $\pm$ 0.5                 | 73.7 $\pm$ 0.6 | 75.0 $\pm$ 0.9 | 76.1 $\pm$ 1.3                 | <b>76.9<math>\pm</math>1.2</b> |

Table 3: Test accuracy (%) for **domain adaptation** by various methods (ours in bold and line separated; BNM and CSGz-DA baselines included) on **Shifted-MNIST** (top two rows), **ImageCLEF-DA** (mid-top four rows), **PACS** (mid-bottom four rows) and **VLCS** (bottom four rows) datasets. Results of DANN, DAN and CDAN on ImageCLEF-DA are taken from [74], and results of DANN and CDAN on PACS and VLCS are taken from [39]. Averaged over 10 runs.

| task          |                                               | DANN           | DAN            | CDAN                           | MDD            | BNM                            | CSGz-DA                        | CSG-DA                         |
|---------------|-----------------------------------------------|----------------|----------------|--------------------------------|----------------|--------------------------------|--------------------------------|--------------------------------|
| Shifted-MNIST | $\delta_0 = \delta_1 = 0$                     | 40.9 $\pm$ 3.0 | 40.4 $\pm$ 2.0 | 41.0 $\pm$ 0.5                 | 41.9 $\pm$ 0.8 | 40.8 $\pm$ 1.0                 | 78.0 $\pm$ 7.2                 | <b>97.6<math>\pm</math>4.0</b> |
|               | $\delta_0, \delta_1 \sim \mathcal{N}(0, 2^2)$ | 46.2 $\pm$ 0.7 | 45.6 $\pm$ 0.7 | 46.3 $\pm$ 0.6                 | 45.8 $\pm$ 0.3 | 45.7 $\pm$ 1.0                 | 68.1 $\pm$ 7.4                 | <b>72.0<math>\pm</math>9.2</b> |
| ImageCLEF-DA  | <b>C<math>\rightarrow</math>P</b>             | 74.3 $\pm$ 0.5 | 69.2 $\pm$ 0.4 | 74.5 $\pm$ 0.3                 | 74.1 $\pm$ 0.7 | <b>75.2<math>\pm</math>1.4</b> | 74.3 $\pm$ 0.3                 | <b>75.1<math>\pm</math>0.5</b> |
|               | <b>P<math>\rightarrow</math>C</b>             | 91.5 $\pm$ 0.6 | 89.8 $\pm$ 0.4 | <b>93.5<math>\pm</math>0.4</b> | 92.1 $\pm$ 0.6 | <b>93.5<math>\pm</math>2.8</b> | 92.7 $\pm$ 0.4                 | <b>93.4<math>\pm</math>0.3</b> |
|               | <b>I<math>\rightarrow</math>P</b>             | 75.0 $\pm$ 0.6 | 74.5 $\pm$ 0.4 | 76.7 $\pm$ 0.3                 | 76.8 $\pm$ 0.4 | 76.7 $\pm$ 1.4                 | 77.0 $\pm$ 0.3                 | <b>77.4<math>\pm</math>0.3</b> |
|               | <b>P<math>\rightarrow</math>I</b>             | 86.0 $\pm$ 0.3 | 82.2 $\pm$ 0.2 | 90.6 $\pm$ 0.3                 | 90.2 $\pm$ 1.1 | <b>91.0<math>\pm</math>0.8</b> | 90.6 $\pm$ 0.4                 | <b>91.1<math>\pm</math>0.5</b> |
| PACS          | others $\rightarrow$ <b>P</b>                 | 97.6 $\pm$ 0.2 | 97.6 $\pm$ 0.4 | 97.0 $\pm$ 0.4                 | 97.6 $\pm$ 0.3 | 87.6 $\pm$ 4.2                 | 97.6 $\pm$ 0.4                 | <b>97.9<math>\pm</math>0.2</b> |
|               | others $\rightarrow$ <b>A</b>                 | 85.9 $\pm$ 0.5 | 84.5 $\pm$ 1.2 | 84.0 $\pm$ 0.9                 | 88.1 $\pm$ 0.8 | 86.4 $\pm$ 0.4                 | 88.0 $\pm$ 0.8                 | <b>88.8<math>\pm</math>0.7</b> |
|               | others $\rightarrow$ <b>C</b>                 | 79.9 $\pm$ 1.4 | 81.9 $\pm$ 1.9 | 78.5 $\pm$ 1.5                 | 83.2 $\pm$ 1.1 | 83.6 $\pm$ 1.7                 | <b>84.6<math>\pm</math>0.9</b> | <b>84.7<math>\pm</math>0.8</b> |
|               | others $\rightarrow$ <b>S</b>                 | 75.2 $\pm$ 2.8 | 77.4 $\pm$ 3.1 | 71.8 $\pm$ 3.9                 | 80.2 $\pm$ 2.2 | 59.1 $\pm$ 1.5                 | 80.9 $\pm$ 1.2                 | <b>81.4<math>\pm</math>0.8</b> |
| VLCS          | others $\rightarrow$ <b>V</b>                 | 78.3 $\pm$ 0.3 | 74.6 $\pm$ 0.8 | 76.9 $\pm$ 0.2                 | 79.0 $\pm$ 1.1 | 70.0 $\pm$ 2.5                 | 79.1 $\pm$ 1.4                 | <b>81.1<math>\pm</math>0.8</b> |
|               | others $\rightarrow$ <b>L</b>                 | 64.9 $\pm$ 1.1 | 67.1 $\pm$ 0.5 | 65.2 $\pm$ 0.4                 | 63.8 $\pm$ 0.8 | 54.0 $\pm$ 5.9                 | 69.6 $\pm$ 0.9                 | <b>70.2<math>\pm</math>0.7</b> |
|               | others $\rightarrow$ <b>C</b>                 | 98.5 $\pm$ 0.2 | 98.5 $\pm$ 0.6 | 97.5 $\pm$ 0.1                 | 99.3 $\pm$ 0.3 | 96.5 $\pm$ 5.1                 | 99.3 $\pm$ 0.3                 | <b>99.5<math>\pm</math>0.2</b> |
|               | others $\rightarrow$ <b>S</b>                 | 73.1 $\pm$ 0.7 | 75.0 $\pm$ 1.1 | 73.4 $\pm$ 1.1                 | 75.8 $\pm$ 1.8 | 66.8 $\pm$ 2.0                 | 76.1 $\pm$ 1.8                 | <b>77.1<math>\pm</math>1.1</b> |

meet a serious problem. But the task is hard for identifiability: for each value of a semantic factor, a single elementary training domain cannot show a diverse variation factor. This weakens the power of CSG-DA. On other datasets (shifted-MNIST, PACS, VLCS), spurious correlation is stronger. Shifted-MNIST is deliberately constructed to show a strong digit-position correlation in the training domain while the correlation disappears in test domains. As for PACS and VLCS, whenever different domains have different class proportions, pooling them together introduces a class-style(domain) correlation, which does not hold in a test domain. On the other hand, the training domain of shifted-MNIST shows a noisy position for each digit, and the pooled training domains of PACS and VLCS show a diverse style for each class. So these datasets better satisfy the requirement of CSG-DA meanwhile ameliorating spurious correlation is the key problem. This makes the advantage of CSG-DA more salient.

## G.1 Shifted-MNIST

**Dataset.** The dataset is based on the standard MNIST dataset<sup>21</sup>, where only images of “0” and “1” are collected. The resulting training set has 5,923 (46.77%) “0”s and 6,742 (53.23%) “1”s (12,665 in total) and the test set has 980 (46.34%) “0”s and 1,135 (53.66%) “1”s (2,115 in total). As described in the main text, we horizontally shift each “0” in the training data at random by  $\delta_0$  pixels where  $\delta_0 \sim \mathcal{N}(-5, 1^2)$ , and each “1” by  $\delta_1 \sim \mathcal{N}(5, 1^2)$  pixels. We construct two test sets, where in the first one, each digit from the test set is not moved  $\delta_0 = \delta_1 = 0$ , and is horizontally shifted randomly by  $\delta_0, \delta_1 \sim \mathcal{N}(0, 2^2)$  pixels in the second. All domains have balanced classes.

**Setup and implementation details.** For generative methods (*i.e.*, CSGz(-DA) and our methods CSG(-ind/-DA)), we use a multilayer perceptron (MLP) with 784(for  $x$ )-400-200(first 100 for  $v$ )-50(for  $s$  or  $z$ )-1(for  $y$ ) nodes in each layer for the inference model, and use an MLP with 50(for  $s$ )-(100(for  $v$ )+100)-400-784(for  $x$ ) nodes in each layer for the generative component (*i.e.*, the mean function of the additive Gaussian  $p(x|s, v)$ ). The activation function in the MLPs is the sigmoid function, and the variables  $s$  and  $v$  are taken after the activation. The expectation under  $q(s, v|x)$  in ELBO is estimated by evaluating the function at the mode of the additive Gaussian with reparameterization. For discriminative methods (*i.e.*, CE, CNBB, DANN, DAN, CDAN, MDD, BNM), we use a larger MLP architecture with 784-600-300-75-1 nodes in each layer to compensate the additional parameters of the generative component in generative methods.

For all the methods, we use a mini-batch of size 128 in each optimization step, and use the RMSprop optimizer [110], with weight decay parameter  $1 \times 10^{-5}$ , and learning rate  $1 \times 10^{-3}$  for OOD generalization and  $3 \times 10^{-4}$  for domain adaptation. These hyperparameters are chosen by running and validating using CE and DANN. For generative methods, we take the additive Gaussian variance of the generative mechanism  $p(x|s, v)$  as  $0.03^2$ . The scale of the standard derivations of these additive Gaussian distributions are chosen small to meet the intense causal mechanism assumption in our theory.<sup>22</sup> For the Gaussian variances of  $s$  and  $v$  in  $q(s, v|x)$ , they are also outputs from the discriminative model through additional branches. Each of these branches is a fully-connected layer forked from the last layer of  $s$  or  $v$ , with a softplus activation to ensure positivity. Their weights are learned via the same objectives.

**Hyperparameter configurations.** For both OOD generalization and domain adaptation tasks on the two test domains, we train the models for 100 epochs (average runtime 10 minutes) when all the methods converge in terms of loss and validation accuracy. We align the scale of the supervision loss terms in the objectives of all methods, and scale the ELBO terms with the largest weight that makes training accuracy near 1 in OOD generalization. We then fix the tuned ELBO weight and scale the weight of adaptation terms in a similar way for domain adaptation. Other parameters are tuned similarly. For generative methods (*i.e.*, CSGz(-DA) and our methods CSG(-ind/-DA)), the ELBO weight is  $1 \times 10^{-4}$  selected from  $\{1, 3\} \times 10^{\{-1, -2, \dots, -6\}}$ . For domain adaptation methods, the adaptation weight is  $1 \times 10^{-4}$  for DANN,  $1 \times 10^{-8}$  for DAN,  $1 \times 10^{-6}$  for CDAN,  $1 \times 10^{-6}$  for MDD,  $1 \times 10^{-7}$  for BNM, and  $1 \times 10^{-4}$  for CSGz-DA and CSG-DA, all selected from  $1 \times 10^{\{-1, -2, \dots, -8\}}$ . For CNBB, we use regularization coefficients  $1 \times 10^{-4}$  and  $3 \times 10^{-6}$  to regularize the sample weight and learned representation, and run 4 inner gradient descent iterations with learning rate  $1 \times 10^{-3}$  to optimize the sample weight. These four parameters are selected from a grid search where the range of the parameters are:  $\{1, 3\} \times 10^{\{-2, -3, -4\}}$ ,  $\{1, 3\} \times 10^{\{-4, -5, -6\}}$ ,  $\{4, 8\}$ ,  $1 \times 10^{\{-1, -2, -3\}}$ .

## G.2 ImageCLEF-DA

**Dataset.** ImageCLEF-DA<sup>23</sup> is a standard benchmark dataset for the ImageCLEF 2014 domain adaptation challenge [1]. There are three domains in this dataset: Caltech-256, ImageNet and Pascal VOC 2012. Each domain has 12 classes and 600 images. Each image is center-cropped to shape (3, 224, 224) as  $x$  (also for PACS and VLCS experiments).

<sup>21</sup><http://yann.lecun.com/exdb/mnist/>

<sup>22</sup>Choosing small variances is also supported by a direct analysis of additive Gaussian VAEs [26] for well learning the data manifold.

<sup>23</sup><http://imageclef.org/2014/adaptation>

**Setup and implementation details.** We adopt the same setup as in Long et al. [74]<sup>24</sup> for a common practice and fair comparison with existing results. This means that we use the ResNet50 structure [40] pretrained on the ImageNet dataset as the backbone of the discriminative/inference model. For CSG(-ind/-DA), we select the first 128 dimensions of the bottleneck layer (*i.e.*, the layer that replaces the last fully-connected layer of the pretrained ResNet50; its output dimension is 1024) as the variable  $v$ , and take  $s$  as the 256-dimensional output of the two-layer MLP (with 1024 hidden nodes) built on the bottleneck layer. Both  $s$  and  $v$  are taken before activation. The logits for  $y$  is produced by a linear layer built on  $s$ .

For generative methods (*i.e.*, CSGz(-DA) and our methods CSG(-ind/-DA)), we construct an image decoder/generator for the mean function of the additive Gaussian  $p(x|s, v)$  that uses the DCGAN generator model [90] pretrained on the Cifar10 dataset as the backbone. The pretrained DCGAN is taken from the PyTorch-GAN-Zoo<sup>25</sup>. The generator connects to the DCGAN backbone by an MLP with 384(dimension of  $(s, v)$ )-128-120(input dimension of DCGAN) nodes in each layer, and generates images of desired size (3, 224, 224) by appending to the output of DCGAN of size (3, 64, 64) with an transposed convolution layer with kernel size 4, stride size 4, and padding size 16. The expectation under  $q(s, v|x)$  in ELBO is estimated by evaluating the function at the mean of the conditional Gaussian with reparameterization.

Following Long et al. [74], we use a mini-batch of size  $n_B = 32$  in each optimization step, and adopt the SGD optimizer with Nesterov momentum parameter 0.9, weight decay parameter  $5 \times 10^{-4}$ , and a shrinking step size scheme  $\varepsilon_i = \varepsilon_0(1 + \alpha n_B i)^{-\beta}$  for optimization iteration  $i$ , with initial scale  $\varepsilon_0 = 1 \times 10^{-3}$ , per-datum coefficient<sup>26</sup>  $\alpha = 6.25 \times 10^{-6}$ , and shrinking exponent  $\beta = 0.75$ . For the parameters of the backbone components, a 10 times smaller learning rate is used. For generative methods, the Gaussian variances of  $s$  and  $v$  in  $q(s, v|x)$  are also outputs from the discriminative model through additional branches. Each of these branches is a fully-connected layer forked from the last layer of  $s$  or  $v$ , with a softplus activation to ensure positivity. Their weights are learned via the same objectives.

**Hyperparameter configurations.** For all the four OOD prediction tasks, we train the models for 30 epochs (average runtime 10 minutes) when all the methods converge in terms of loss and validation accuracy. For generative methods, the Gaussian variance of  $p(x|s, v)$  is taken as 0.1, which is searched within  $\{1, 3\} \times 10^{\{-4, -2, -1, 0, 2, 4\}}$ . The ELBO weight is  $1 \times 10^{-7}$  for CSGz(-DA) and is  $1 \times 10^{-8}$  for our CSG(-ind/-DA), both selected from  $1 \times 10^{\{-2, -4, -6\}} \cup \{1, 3\} \times 10^{\{-7, -8, -9, -10\}}$ . The adaptation weight is  $1 \times 10^{-8}$  selected from  $1 \times 10^{\{-2, -4, -6\}} \cup \{1, 3\} \times 10^{\{-7, -8, -9, -10\}}$  for both CSGz-DA and CSG-DA,  $1 \times 10^{-2}$  selected from  $1 \times 10^{\{-1, -2, -4, -6\}}$  for MDD, and 1.0 selected from  $1 \times 10^{\{1, 0, -1, -2, -4\}}$  for BNM. Results of other domain adaptation baselines DANN, DAN and CDAN and the results of CE are taken from [74] under the same setting. For CNBB, we use regularization coefficients  $1 \times 10^{-6}$  and  $3 \times 10^{-6}$  to regularize the sample weight and learned representation, and run 4 inner gradient descent iterations with learning rate  $1 \times 10^{-4}$  to optimize the sample weight. These four parameters are selected from a grid search where the range of the parameters are:  $1 \times 10^{\{-4, -5, -6, -7\}} \cup \{3 \times 10^{-6}\}$ ,  $\{1, 3\} \times 10^{\{-5, -6, -7\}}$ ,  $\{4\}$ ,  $1 \times 10^{\{-2, -3, -4, -5\}}$ .

### G.3 PACS

**Dataset.** The PACS dataset [69] has 7 classes. It is named after its four domains: **Photo**, **Art**, **Cartoon**, **Sketch**; each contains images of a certain style. It contains 9,991 images in total. We use the dataset via the open-source domainbed repository<sup>27</sup> [39].

**Setup and implementation details.** We adopt the same setup as in Gulrajani and Lopez-Paz [39] for a common practice and fair comparison with existing results. This means for each domain as the test domain, the single training domain is constructed by merging/pooling the other three domains. This is done by merging the three mini-batches of size 32 from each of the three domains for optimization. The Adam optimizer [60] with learning rate  $5 \times 10^{-5}$  is adopted. Data augmentation

<sup>24</sup><https://github.com/thuml/CDAN>

<sup>25</sup>[https://github.com/facebookresearch/pytorch\\_GAN\\_zoo](https://github.com/facebookresearch/pytorch_GAN_zoo)

<sup>26</sup>The coefficient  $\alpha$  here is amortized onto each datum, so its value is different from that in Long et al. [74] and a batch size  $n_B$  is multiplied to the iteration number  $i$ .

<sup>27</sup><https://github.com/facebookresearch/DomainBed>

Table 4: Test accuracy (%) for **OOD generalization** (middle 4 columns) and **domain adaptation** (right 3 columns) by various methods (ours in bold and line separated) on **PACS** with **single training domains**. Averaged over 10 runs.

| task     |            | CE              | CSGz     | CSG             | CSG-ind         |  | DAN             | CSGz-DA  | CSG-DA          |
|----------|------------|-----------------|----------|-----------------|-----------------|--|-----------------|----------|-----------------|
| PACS     | <b>C→A</b> | <b>78.9±1.1</b> | 78.2±1.8 | 78.4±1.2        | <b>78.9±1.3</b> |  | <b>80.9±1.2</b> | 79.1±0.7 | 79.1±0.8        |
|          | <b>P→A</b> | 73.1±1.9        | 73.4±1.9 | <b>73.5±0.9</b> | 73.4±1.5        |  | <b>76.6±2.6</b> | 73.8±0.7 | 75.0±0.7        |
|          | <b>S→A</b> | 64.2±2.8        | 63.4±1.6 | 63.7±1.7        | <b>65.4±2.1</b> |  | 62.4±1.8        | 64.7±2.2 | <b>65.7±2.0</b> |
| others→A |            | 88.1±0.1        | 87.3±0.8 | <b>88.5±0.6</b> | <b>88.6±0.6</b> |  | 84.5±1.2        | 88.0±0.8 | <b>88.8±0.7</b> |

is conducted by random flip and crop, gray-scaling and color-jitter (*i.e.*, randomly changing brightness, contrast, saturation and hue). Other setups are basically the same as in the ImageCLEF-DA experiment, except that the layer for variable  $s$  has 512 nodes, and that the backbone components use the same learning rate (*i.e.*, not multiplied by 0.1).

**Hyperparameter configurations.** For all methods we train for 40 epochs (average runtime 30 minutes) when they all converge in terms of loss and validation accuracy. For all generative methods (*i.e.*, CSGz(-DA) and our methods CSG(-ind/-DA)), the Gaussian variance of  $p(x|s, v)$  is taken as 0.3. The ELBO weight is  $1 \times 10^{-7}$  for CSGz, CSG and CSG-ind, and is  $1 \times 10^{-8}$  for CSGz-DA and CSG-DA, both selected from  $1 \times 10^{\{0, -2, -4, -5, -6, -7, -8, -9\}}$ . The adaptation weight is  $1 \times 10^{-8}$  selected from  $1 \times 10^{\{0, -2, -4, -6, -7, -8, -9\}}$  for CSGz-DA and CSG-DA,  $1 \times 10^{-2}$  selected from  $1 \times 10^{\{0, -1, -2, -3, -4, -6\}}$  for DAN, and is the same as in the ImageCLEF-DA experiment for MDD and BNM. Results of other domain adaptation baselines DANN and CDAN and the results of CE are taken from [39] under the same setting. For CNBB, the hyperparameters are the same as in the ImageCLEF-DA experiment, except the regularization coefficients for sample weights is  $1 \times 10^{-4}$ . These hyperparameters are selected from the same range as used in the ImageCLEF-DA experiment.

**Results using single training domains.** We also conducted an experiment on PACS with single training domains, similar to the setup on ImageCLEF-DA. The results are presented in Table 4. We see that the advantage of our methods is not as significant as in the standard pooled training domain case. This agrees with the discussion in the “dataset analysis” in the main paper: our methods are more powerful in handling a misleading spurious  $s$ - $v$  correlation but which needs to be diverse/stochastic enough to allow identification, following the intuition on the identifiability (Thm. 5 Remark (1)).

#### G.4 VLCS

The VLCS dataset [30] has 5 classes. It is also named after its four domains: VOC2007, LabelMe, Caltech101, SUN09; each is an image dataset collected in a certain way. It contains 10,729 images in total. We use the dataset also via the domainbed repository. Setup, implementation details and hyperparameters are the same as in the PACS experiment. Results are shown at the last four rows in Table 2 for OOD generalization and in Table 3 for domain adaptation.

#### G.5 Visualization of the Learned Representation

To better understand how our methods work, we compare the visualization of the learned model by our methods with that by the corresponding baselines. Visualization is done by the *Local Interpretable Model-agnostic Explanation* (LIME) method [91]<sup>28</sup>, which uses an interpretable model, *e.g.* a linear model, to approximate the target model locally at the query image. The learned weight of the linear model then reflects the importance of the components/dimensions of the input, *i.e.* pixels in the image, which can be visualized after binarization as focused regions on the image. This gives a hint on the learned representation by the model for making prediction.

The visualization results are shown in Fig. 5. We see that in each case, the focused regions of our methods (CSG-ind and CSG-DA) are more relevant to the semantic of the image, and the boundary of the region reflects the characterizing shape of the object. In contrast, the baselines also involve much background regions. This result shows our CSG methods indeed better learn a causal semantic factor for prediction, which supports the motivation to introduce the CSG model, verifies the theory, and explains the better robustness for OOD prediction.

<sup>28</sup>We use the official codebase at <https://github.com/marcotcr/lime-experiments>.

Figure 5: Visualization (via LIME [91]) of the learned representation by various methods (ours in bold). The top two rows are for OOD generalization and the bottom two rows are for domain adaptation.

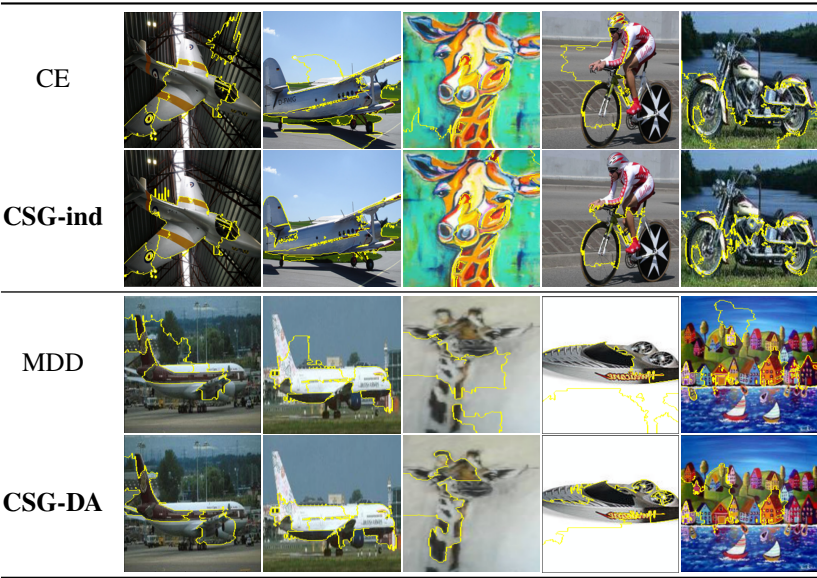

Supplement: Supplementary file [file 310614fca8fb8e5491295336298c340f-Supplemental.pdf]
